# Supplementary material for: Superionic Ionic Conductor Discovery via Multiscale Topological Learning
Source: Research Square preprint supplement (doi:10.21203/rs.3.rs-5627791/v1), 2025-01-29
Supplement: Supplementary file 1 [file fbf7e319cc097ec0a69db3c6.docx]

*Supplementary Information*

Superionic Ionic Conductor Discovery via Multiscale Topological Learning

Dong Chen∗1,2, Bingxu Wang†1, Shunning Li1, Wentao Zhang1, Kai Yang1, Yongli Song1,

Guo-Wei Wei ‡2,4 and Feng Pan §1

1School of Advanced Materials, Peking University, Shenzhen Graduate School, Shenzhen 518055, China

2Department of Mathematics, Michigan State University, MI, 48824, USA

3Department of Electircal and Computer Engineering, Michigan State University, MI 48824, USA

4Department of Biochemistry and Molecular Biology, Michigan State University, MI 48824, USA

∗contributed equally to this work

†contributed equally to this work

‡Corresponding author: weig@msu.edu

§Corresponding author: panfeng@pkusz.edu.cn

Table S1. The number of compounds that passed each steps of the high-throughput screening of

crystal structural framework.

| Screening Step | Number of Compositions |
| --- | --- |
| Remove Duplicate | 2590 |
| Filter Connection Radius | 1443 |
| Filter Servive Betti1 | 770 |
| Clustering Methods | 339 |
| Final screening | 43 |

Table S2. List of known LSICs

| ICSD-IDs | Compositions | Superionic conductor |
| --- | --- | --- |
| 100169 | Li14Zn(GeO4)4 | LISCISON |
| 157654 | Li7P3S11 | Li7P3S11 |
| 163297 | Li1.2(Al0.2Ge0.2Ti1.6) (PO4)3 | NASICON |
| 188887 | Li10GeP2S12 | LGPS |
| 422259 | Li7La3Zr2O12 | LLZO |
| 50422 | Li2.64(Sc0.9Ti0.1)2(PO4)3 | Li3A2(PO4)3 |
| 35018 | Li3PS4 | Li-P-S |
| 92200 | Li4GeS4 | Li-Ge-S |
| 174202 | Li7La3Hf2O12 | Garnet |
| 191542 | Li6.46Al0.081La3Zr2O12 | Garnet |
| 185539 | Li6.06Al0.201La3Zr2O12 | Garnet |
| 185540 | Li6.06Al0.201La3Zr2O12 | Garnet |
| 238693 | La3Li5.8Zn0.6Zr2O12 | Garnet |
| 238692 | La3Li5.8Zn0.6Zr2O12 | Garnet |
| 238690 | Al0.24La3Li6.28Zr2O12 | Garnet |
| 238689 | Al0.24La3Li6.28Zr2O12 | Garnet |
| 195182 | (Li6.26Al0.24)La3Zr2O12 | Garnet |
| 69076 | La3Li5Sb2O12 | Garnet |
| 174612 | Li6(CaLa2)Sb2O12 | Garnet |
| 174615 | Li6.4(Ca1.4La1.6)Sb2O12 | Garnet |
| 174617 | Li6.4(Ca1.4La1.6)Sb2O12 | Garnet |
| 158373 | Li6SrLa2Bi2O12 |  |
| 161342 | Li5La3(Sb2O12) | Garnet |
| 161343 | Li5La3(Sb2O12) | Garnet |
| 161389 | Li5La3(SbO6)2 | Garnet |
| 163914 | Li7La3Sn2O12 | Garnet |
| 182034 | Li7La3Sn2O12 | Garnet |
| 182035 | Li2.25H4.75La3Sn2O12 | Garnet |
| 182036 | Li4.59H2.41La3Sn2O12 | Garnet |
| 245641 | Li5La3(SbO6)2 | Garnet |
| 245934 | Li6SrLa2Sb2O12 | Garnet |
| 245935 | Li6.4Sr1.4La1.6Sb2O12 | Garnet |
| 246817 | Li7La3Zr2O12, | Garnet |
| 261302 | Li7La3Zr2O12, | Garnet |
| 183684 | Li7La3Zr2O12, | LLZO |
| 183685 | Li7La3Zr2O12, | Garnet |
| 184230 | Li7La3(ZrO6)2 | Garnet |
| 191528 | Li7La3Zr2O12, | Garnet |
| 183607 | Li7La3Zr2O12, | Garnet |
| 238687 | Li7La3Zr2O12, | Garnet |
| 238686 | Li7La3Zr2O12, | Garnet |
| 65025 | Li2Mg2(SO4)3 | Li3A2(PO4)3 |
| 62300 | Li3Sc2(PO4)3 | Li3A2(PO4)3 |
| 91113 | Li2.72Ti2(PO4)3 | Li3A2(PO4)3 |
| 202539 | Li2.68(Ti1.86Al0.14)(PO4)3, | NASICON |
| 94029 | (Li0.72Na0.88)(Ti1.4Al0.6)(PO4)3 | NASICON |
| 94030 | (Li1.09Na0.71)(Ti1.2Al0.8)(PO4)3 | NASICON |
| 94031 | (Li1.45Na0.45)(Ti1.1Al0.9)(PO4)3 | NASICON |
| 163299 | Li1.2(Al0.2Ge0.4Ti1.4)(PO4)3 | NASICON |
| 163300 | Li1.4(Al0.4Ge0.4Ti1.2)(PO4)3 | NASICON |
| 163301 | Li1.6(Al0.6Ge0.4Ti)(PO4)3 | NASICON |
| 163302 | Li1.2(Al0.2Ge0.6Ti1.2)(PO4)3 | NASICON |
| 163303 | Li1.4(Al0.4Ge0.6Ti)(PO4)3 | NASICON |
| 163304 | Li1.6(Al0.6Ge0.6Ti0.8)(PO4)3 | NASICON |
| 163305 | Li3Ti2(PO4)3, Li2.93Ti2(PO4)3 | NASICON |
| 193036 | Li2.93Ti2(PO4)3 | NASICON |
| 193037 | Li2.8Ti2(PO4)3, | NASICON |
| 193032 | Li1.2(Al0.2Ge0.6Ti1.2)(PO4)3 | NASICON |
| 193038 | Li3Ti2(PO4)3 | NASICON |
| 193033 | Li1.6(Al0.6Ge0.4Ti)(PO4)3 | NASICON |
| 92250 | LiZr2(PO4)3 | Li3A2(PO4)3 |
| 97658 | Li2Ti2(PO4)3 | NASICON |
| 97659 | Li2.96(Sc0.9Zr0.1)2(PO4)3 | NASICON |
| 97660 | LiZr2(PO4)3 | NASICON |
| 191891 | Li1.15(Y0.15Zr1.85)(PO4)3 | NASICON |
| 245527 | Li0.7La0.1Zr2(PO4)3 | NASICON |
| 257190 | Li1.12Ti1.88In0.12(PO4)3 | NASICON |
| 20208 | Li3(PO4) | LISICON |
| 25816 | Li3Zn0.5(GeO4) | LISICON |
| 34221 | Li2.5Ga0.5GeO4 | LISICON |
| 50058 | Li3PO4 | Li-P-O |
| 79427 | Li3.5Zn.25GeO4 | LISICON |
| 77095 | Li14Zn(GeO4)4 | LISICON |
| 8280 | Li2MgGeO4 | LISICON |
| 65643 | Li2.5Ga0.5GeO4 | LISICON |
| 78513 | Li3Zn.5GeO4 | LISICON |
| 100167 | Li3.5Zn.25GeO4 | LISICON |
| 100169 | Li6.6SiPO8 | LISICON |
| 202631 | Li3PO4 | LISICON |
| 202632 | Li2.5Ga0.5GeO4 | LISICON |
| 166547 | Li2MgGeO4 | LISICON |
| 238601 | Li2.5Ga0.5GeO4 | LISICON |
| 290831 | Li4SnS4 | Li-Ge-S |
| 290832 | Li4SnS4 | Li-Ge-S |
| 50578 | Li4GeS4 | Li-Ge-S |
| 92200 | Li4GeS4 | Li-Ge-S |
| 95649 | Li4GeS4 | Li-Ge-S |
| 188886 | Li10(GeP2S12) | LGPS |
| 188887 | Li10(SnP2S12) | LGPS |
| 193755 | Li10.35((Ge1.35P1.65)S12) | LGPS |
| 193947 | Li10.35Si1.35P1.65S12 | LGPS |
| 241439 | Li9.81Sn0.81P2.19S12 | LGPS |
| 252036 | Li10(Ge0.416Sn0.584)P2S12 | LGPS |
| 252037 | Li10(Ge0.776Sn0.224)P2S12 | LGPS |
| 252038 | Li10.35(Sn0.27Si1.08), P1.65S12 | LGPS |
| 252039 | Li10.35(Sn0.27Si1.08), P1.65S12 | LGPS |
| 252040 | Li10.5(Sn0.2Si0.8)1.5P1.5S12 | LGPS |
| 252041 | Li10.2(Sn0.2Si0.8)1.2P1.8S12 | LGPS |

Table S3. Oxide compounds that passed the high-throughput screening of crystal structural framework but rejected by other considerations.

| ICSD-IDs | Compositions | Reasons |
| --- | --- | --- |
| 19024, 27007, 27008, 30964, 33809, 33810, 36532, 56443, 60363, 61086, 61087, 65127, 78059, 84240, 96224, 239794, 243972, 253007, 257739, 281011, 415121, 416926, 416927, 416928, 416929, 417653, 421259, 421549, 423635, 432026, 19023, 67238, 92571, 421548, 260280 | Li2CaGeO4, Na3Li3Sc2F12, Na3Li3In2F12, KLiO, Cs2Li2(SiO4), Cs2Li2(TiO4), Cs2Li2(GeO4), LiSrP, Na3Li3Ti2F12, Rb2Li2SiO4, Rb2Li2GeO4, LiGaGeO4, Li2(TiSiO5), Li(Al7B4O17), LiSr(GaN2), LiSc(SeO3)2, LiCsCO3, LiGaGe2Se6, LiGaGeO4, Li2PbGeS4, Li2(TeSe3), Li3Na3(InF6)2, Li6Y3(PS4)5, Li4Sr3(Si2N6), SrLi2N4Si2, CsLi2Cl3, Li3Y(BO3)2, Li2CaSiO4, LiAlGeO4, KLi(CO3), CaLi2N4Si2, Li2Zn3(P2O7)2 | Bad Li network |
| 610785 | Li3As | Binary compounds |
| 90147 | Cs14Li22.72(Li18.4Si72O172)(D2O)6.16 | Containing D2O |
| 88334 | Li6(P6O18)(H2O)9.86 | Containing H |
| 6269, 67925, 171366, 62586, 428547 | Li0.91(Al0.91Si1.09O4)(H2O)0.98, Li8(HPO4)(Be6P6O24)(H2O), K2.6Li5.4(Li4Si16O38)(H2O)4.3, Li4(P4O12)(H2O)5, (Li2(H2O)7)Se | Containing H2O |
| 251594 | Li6RbB2O6F | Containing O and F |
| 50992 | Li(Y0.95Eu0.05)O2 | Containing Y, Eu |
| 432591 | Li4PN3 | High-pressure hynthesis. The product is sensitive to traces of air and moisture. |
| 161763, 250297, 50612 | Li2Ga2GeS6, Li2Ti(GeO4)O, Li3Sc2(PO4)3, Li2(BAlO4) | ehull>50emV |
| 188886, 188887, 193755, 193947, 241439, 252036, 252037, 252038, 252039, 252040, 252041, 255747, 255748, 255749, 257946, 257947, 257948 | Li10(GeP2S12), Li10(SnP2S12), Li10.35((Ge1.35P1.65)S12), Li10.35Si1.35P1.65S12, Li9.81Sn0.81P2.19S12, Li10(Ge0.416Sn0.584)P2S12, Li10(Ge0.776Sn0.224)P2S12, Li10.35(Sn0.27Si1.08), P1.65S12, Li10.5(Sn0.2Si0.8)1.5P1.5S12, Li10.2(Sn0.2Si0.8)1.2P1.8S12 | LGPS |
| 161342, 161343, 161389, 163914, 174202, 174612, 174613, 174614, 174615, 174616, 174617, 182034, 182035, 182036, 183607, 183685, 184230, 185539, 185540, 191528, 191542, 195182, 238686, 238687, 238689, 238690, 238692, 238693, 241475, 245641, 245934, 245935, 246817, 253056, 261302, 430571, 430575, 430576, 430602, 69076 | Li5La3(Sb2O12), Li6(SrLa2)(Sb2O12), Li5La3(SbO6)2, Li7La3Sn2O12, Li7La3Hf2O12, Li6(CaLa2)Sb2O12, Li6.4(Ca1.4La1.6)Sb2O12, Li7La3Sn2O12, Li2.25H4.75La3Sn2O12, Li4.59H2.41La3Sn2O12, Li7La3Zr2O12, Li7La3(ZrO6)2, Li6.06Al0.20La3Zr2O12, Li7La3Zr2O12, Li6.46Al0.081La3Zr2O12, (Li6.26Al0.24)La3Zr2O12, La3Li7Zr2O12, Al0.24La3Li6.28Zr2O12, La3Li5.8Zn0.6Zr2O12, Li51.2Al1.6La24Zr16O96, Li5La3(SbO6)2, Li5La3(SbO6)2, Li6.4Sr1.4La1.6Sb2O12, Li7La3Zr2O12, Li7La3Hf2O12, Li5.91Al0.216La2.95Zr2O12, Al0.11Ga0.08La2.94Li6.85Zr2O12, Al0.19Ga0.05La2.88Li5.55O12Zr2, Li6.55Ga0.05La2.91Zr2O12, La3Li5Sb2O12 | Garnet |
| 23017, 38350, 50421, 68494, 253896, 431368, 431573, 642303, 35405, 65445, 255464, 40247, 55665, 72100, 35290, 65126, 73223, 79098, 8372, 169799, 26817, 249872, 249873, 254974 | Li4Zn(PO4)2, Li4PbO4, Li3.2Sc2(PO4)3, Li10(Zn4O9), Li10Si2P6, Li2SiP2, LiSbS2, Rb2Li14(Pb3O14), K2Li14(Zr3O14), Li4Zn(PO4)2**,** Li6TeO6**,** LiAlSiO4**,** Li3GaSiO5**,** LiAlSi2O6, Li3AsS3, K2Li3GaO4, LiAlGeO4, Li2ZnBr4, Li5La3Bi2O12, Li2.2Zn0.8P2O7 , Li2CdGeS4, Li2CdSnS4, Li2CdGeSe4 | Duplicate structure |
| 47143, 47144, 47145, 428002, 14364, 67702, 67703, 95407, 239962, 254107, 30276 | Li3.175(SiO4)0.7(SO4)0.3, Li3.17Si0.7S0.3O4, Li3.4Si0.7S0.3O4, Li5(B(SO4)4), LiNa(SO4), Li4(SO4)2, LiNaSO4, Li2SO4 | Containing SO42- |
| 25308, 42062, 42068, 171497, 419577, 426692, 429881 | Li9Ge4, LiGe, Li11Ge6, Li8Zn2Ge3, Ge12Li7, Li18Na2Ge17, Li3NaGe2 | Germanide, Ge unusual valence state |
| 26298, 80593, 255465, 255466, 255468, 264522, 78514, 153218, 255467 | (Sr7Li4Si10)0.1429, Li2.5Al0.5(SiO4), Li4Zn(PO4)2, Li3.7Zn0.7Ga0.3(PO4)2, Li3.5Zn0.5Ga0.5(PO4)2, Hf2La3(Li6.74Al0.08)O12, Li2.42Ga0.58GeO4, Li2.46Al0.18(BO3), Li3.7Zn0.7Ga0.3(PO4)2 | Li sharing sites with: Si,  Al, Zn, Ga |
| 50422, 62300, 65025, 71277, 91113, 92250 | Li2.64(Sc0.9Ti0.1)2(PO4)3, Li3Sc2(PO4)3, Li2Mg2(SO4)3, Li2.72Ti2(PO4)3, LiZr2(PO4)3 | Li3A2(PO4)3 |
| 1037, 16229 | Li5AlO4 | Li-Al-O |
| 433369 | Li5AlS4 | Li-Al-S |
| 165579, 413238 | Li(ClO4) | Li-Cl-O |
| 31050, 100403 | Li6Ge2O7, Li2(GeO3) | Li-Ge-O |
| 50578, 92200, 95649, 290831, 290832 | Li4GeS4, Li4SnS4 | Li-Ge-S |
| 638, 50058, 79426, 85714, 246859, 248414, 257439 | LiPO3, Li3PO4, Li2.88PO3.73N0.14, Li6P6O18, Li4P2O7 | Li-P-O |
| 35018, 157654, 180318, 242170 | Li3PS4, Li7(P3S11), Li4P2S6 | Li-P-S |
| 48106 | Li2SeO4 | Li-Se-O |
| 8280, 20031, 20208, 25816, 34221, 65643, 77095, 78513, 79427, 100167, 100169, 166547, 202631, 202632, 238601, 257440 | Li2MgGeO4, Li2CdGeO4, Li3(PO4), Li3Zn0.5(GeO4), Li2.5Ga0.5GeO4, Li14Zn(GeO4)4, Li2Mg(GeO4), Li3Zn.5GeO4, Li3.5Zn.25GeO4, Li6.6SiPO8, Li3PO4 | LISICON |
| 65176 | Li8O2SiO4 | Li-Si-O |
| 58, 2512, 23723, 59243, 153806, 431359 | Li2SO4, Li4P2O7, Li2S5O16 | Li-S-O |
| 415120 | Li2TeS3 | Li-Te-S |
| 16219 | Li5TlO4 | Li-Tl-O |
| 75164 | Li4TiO4 | Li-Ti-O |
| 59646, 59647, 99395, 99396, 99397, 99398, 99399, 99402, 236888 | (La0.62Li0.16)(TiO3), (Li0.18La0.122)La0.483(TiO3), (Li0.18La0.119)La0.483(TiO3), (Li0.18La0.118)La0.484(TiO3), (Li0.18La0.123)La0.485(TiO3), (Li0.18La0.118)La0.492(TiO3), (Li0.18La0.121)La0.482(TiO3), La4.44Li2.66Ti8O24 | LLTO |
| 183684, 238685, 238688, 238691, 422259, 83652 | Li7La3Zr2O12, La3Li7Zr2O12, Al0.24La3Li6.28Zr2O12, La3Li5.8Zn0.6Zr2O12, Li7La3Zr2O12 | LLZO |
| 254406 | LiGaGe2S6 | Low Melting Point |
| 1384, 243929, 264211, 391200, 421083, 426103 | Li(SO3F), Li24Sr12(Si24N47O)F, Li40.70Y3.30Ca5.70(Li2Si30N59)O2F, Li5.88H4.5(P12O2N22)Cl2.556, Li6(PS4)(SI), Li9Mg3(PO4)4F3 | Multiple anions |
| 63018, 94029, 94030, 94031, 95980, 95981, 163297, 163298, 163299, 163300, 163301, 163302, 163303, 163304, 163305, 193032, 193033, 193034, 193035, 193036, 193037, 193038, 193039, 193040, 193041, 202538, 202539, 257190, 261825, 50423, 97658, 97659, 97660, 191891, 245527 | Li1.15Ti1.85In0.15P3O12, (Li0.72Na0.88)(Ti1.4Al0.6)(PO4)3, (Li1.09Na0.71)(Ti1.2Al0.8)(PO4)3, (Li1.45Na0.45)(Ti1.1Al0.9)(PO4)3, Li3.18Ti2(PO4)3, Li1.2(Al0.2Ge0.2Ti1.6)(PO4)3, Li1.4(Al0.4Ge0.2Ti1.4)(PO4)3, Li1.6(Al0.6Ge0.2Ti1.2)(PO4)3, Li1.2(Al0.2Ge0.4Ti1.4)(PO4)3, Li1.4(Al0.4Ge0.4Ti1.2)(PO4)3, Li1.6(Al0.6Ge0.4Ti)(PO4)3, Li1.2(Al0.2Ge0.6Ti1.2)(PO4)3, Li1.4(Al0.4Ge0.6Ti)(PO4)3, Li1.6(Al0.6Ge0.6Ti0.8)(PO4)3, Li3Ti2(PO4)3, Li2.93Ti2(PO4)3, Li2.8Ti2(PO4)3, Li3(Ti1.82Al0.18)(PO4)3, Li3(Ti1.79Al0.21)(PO4)3, Li3(Ti1.78Al0.22)(PO4)3, Li3(Ti1.83Al0.17)(PO4)3, Li2.8(Ti1.82Al0.18)(PO4)3, Li2.68(Ti1.86Al0.14)(PO4)3, Li1.12Ti1.88In0.12(PO4)3, Li1.15Ti1.85In.15(PO4)3, Li1.3Al0.3Ti1.7(PO4)3, Li2Ti2(PO4)3, Li2.96(Sc0.9Zr0.1)2(PO4)3, LiZr2(PO4)3, Li1.15(Y0.15Zr1.85)(PO4)3, Li0.7La0.1Zr2(PO4)3 | NASICON |
| 432318 | Li141N126B9P42 | Number atoms > 500, further calculations due |
| 60774, 100465, 642222 | Li3P7, LiP | P unusual valence state |
| 78836, 107304 | Li5NBr2, LiCaN | Redox reactions without the participation of Li |
| 100020 | Li2Sb | Sb unusual valence state |
| 67359, 193768, 264695 | LiNaSe, Li4SnSe4, Li2ZnSe2O6 | Selenide |
| 431316 | Li18N16P6 | sigma,348k,7.7E-8 to 1.46E-6; E_a=48.3kJ/mol |
| 24146, 41023, 87408, 281277, 430497, 642372 | Li2Si, Li8MgSi6, Li2.35Si, Al3.39Li14.61Si6, Li11.56Na0.44Si7 | Silicide |
| 182961 | (Li2(Ti3O7))1.143 | Ternary oxides containing Ti |
| 250066 | Li3.05Ge0.31P0.69O4 | Excluded from further calculations due to the large number of fractional occupied ions in the unit cell |
| 26472, 409657 | LiAs, As7Li3 | As unusual valence state |
| 158373, 238600, 255750, 420126 | Li6SrLa2Bi2O12, Li6.5Si0.5P1.5O8, Li10SnP2S12, Li2SiN2 | Very high conductive after doped |

Table S4. Oxide compounds that passed the high-throughput screening of crystal structural framework

| ICSD-IDs | Compositions | Structure Type |
| --- | --- | --- |
| 1411 | Li4(PbO4) | Li4PbO4 |
| 2319 | Li2BeSiO4 | Li2BeSiO4(oS32) |
| 4317 | Li2TeO3 | Li2TeO3 |
| 6169 | Li6Al2(BO3)4 | Li3AlB2O6 |
| 8237 | Li2Zn(SiO4) | Li2ZnSiO4 |
| 9987 | Li6Ga2(BO3)4 | Li3AlB2O6 |
| 15631 | Li7(SbO6) |  |
| 23634 | Li10(Zn4O9) |  |
| 26297 | Li6(TeO6) | Li6TeO6 |
| 26817 | LiAl(Si2O6) | LiAlSi2O6 |
| 35250 | K2Li14(Pb3O14) | K2Li14Pb3O4 |
| 37071 | Li3Na2(GaO4) | Li3Na2GaO4 |
| 38324 | Li3KGeO4 | CsNa3TiO4 |
| 40245 | Li3BiO3 |  |
| 40457 | LiSbS2 | AgAsS2 |
| 50950 | LiZn(PO4) | LiZnPO4 |
| 59381 | Li3(AsS3) |  |
| 59640 | Li4Zn(PO4) 2 | Li4O8P2Zn |
| 61204 | Na4Li5(BO3)3 |  |
| 67991 | Li14Be5B(BO3)9 |  |
| 69967 | NaLi2(PO4) | Li3PO4 |
| 71035 | KLi6(BiO6) | KLi6IrO6 |
| 72840 | Li6K(BiO6) |  |
| 74864 | CsKNa2Li8(Li(SiO4))4 | CsKNa2Li8(LiSiO4)4 |
| 74865 | RbNa3Li8(Li(SiO4))4 | CsKNa2Li8(LiSiO4)4 |
| 78326 | Li10(Si2PbO10) |  |
| 78819 | Li10N3Br |  |
| 86184 | LiZn(AsO4) | LiGaSiO4 |
| 86458 | Li3Sc2(PO4)3 | Li3Fe2(PO4)3 |
| 87596 | Li2(TiO)(SiO4) | Li2TiSiO5 |
| 92708 | Li(AlSiO4) | LiGaSiO4 |
| 95972 | Li2(MgSiO4) | Li2ZnSiO4 |
| 202115 | NaLi3(SiO4) | NaLi3SiO4 |
| 202116 | NaLi3GeO4 | NaLi3SiO4 |
| 241234 | Li3Sc(BO3)2 |  |
| 252215 | Li3AlSiO5 | AlFeO3 |
| 253895 | Li10Si2P6 |  |
| 257740 | LiGa0.5Al0.5GeO4 | LiGaSiO4 |
| 262642 | In2Li2SiS6 | Cd4GeS6 |
| 262643 | In2Li2GeS6 | Cd4GeS6 |
| 402341 | LiBeN |  |
| 413355 | (LiI)2(Li3(SbS3)) |  |
| 424834 | Li3SbS3 |  |
| 424835 | Li3AsS3 |  |
| 431367 | Li2SiP2 |  |

Table S5. Ionic conductivity at 800 K, 1000 K, 1200 K, and 1400 K and room temperature (300K) and activation barrier of oxide compounds that passed the high-throughput screening of crystal structural framework

| ICSD-IDs | Compositions | Ionic conductivity | | | | | Activation barrier |
| --- | --- | --- | --- | --- | --- | --- | --- |
| 800K | 1000K | 1200K | 1400K | 300K |
| 1411 | Li4(PbO4) | 1.146 | 5.196e-1 | 4.740e+1 | 3.473e+3 | 4.341e-15 | 1.345 |
| 2319 | Li2BeSiO4 | 7.644e-1 | 5.898e-1 | 1.579e-1 | 2.377e-1 | 7.724e+1 | -0.148 |
| 4317 | Li2TeO3 | 1.782 | 6.974e-10 | 1.542e+2 | 8.987e+2 | 6.879e-22 | 1.729 |
| 6169 | Li6Al2(BO3)4 | 2.396e+1 | 1.490e+1 | 3.967e+1 | 5.567e-10 | 3.515e+34 | -2.935 |
| 8237 | Li2Zn(SiO4) | 2.739e-1 | 7.158e-10 | 8.013e-2 | 5.113e-10 | 1.708e+19 | -1.973 |
| 9987 | Li6Ga2(BO3)4 | 1.266 | 4.612e+1 | 1.698e+2 | 8.764e+1 | 1.291e-8 | 0.826 |
| 15631 | Li7(SbO6) | 7.079e+2 | 1.119e+3 | 1.491e+3 | 1.642e+3 | 7.634e | 0.228 |
| 23634 | Li10(Zn4O9) | 5.251 | 3.960e+1 | 9.849e+1 | 1.359e+2 | 4.694e-6 | 0.624 |
| 26297 | Li6(TeO6) | 2.822 | 8.745e-1 | 5.879e-1 | 9.491e-10 | 7.908e+30 | -2.71 |
| 26817 | LiAl(Si2O6) | 8.973e+1 | 1.302e+2 | 2.644e+2 | 2.456e+2 | 3.194e-1 | 0.272 |
| 35250 | K2Li14(Pb3O14) | 1.122 | 5.584e-1 | 4.608e+1 | 2.170e+2 | 3.291e-11 | 0.998 |
| 37071 | Li3Na2(GaO4) | 5.986e-1 | 2.907e-1 | 1.648e-1 | 6.053e-10 | 5.059e+28 | -2.567 |
| 38324 | Li3KGeO4 | 2.183 | 8.618e-10 | 7.182e-10 | 7.627e+2 | 1.359e-4 | 0.056 |
| 40245 | Li3BiO3 | 6.923e+1 | 7.249e+2 | 7.665e+2 | 1.669e+3 | 2.327e-4 | 0.573 |
| 40457 | LiSbS2 | 5.444e+1 | 2.734e+1 | 1.143e+2 | 2.578e+2 | 1.897e-2 | 0.349 |
| 50950 | LiZn(PO4) | 6.880e-1 | 8.750e-1 | 1.108e-1 | 2.157e-1 | 1.600e+2 | -0.176 |
| 59381 | Li3(AsS3) | 1.056e+3 | 1.975e+3 | 2.058e+3 | 3.407e+3 | 5.220 | 0.260 |
| 59640 | Li4Zn(PO4) 2 | 1.220e+2 | 4.183e+1 | 1.568e+2 | 9.221e+2 | 1.320e-2 | 0.387 |
| 61204 | Na4Li5(BO3)3 | 4.649e-1 | 7.186e-10 | 3.186e+1 | 2.645e+2 | 6.732e-22 | 1.693 |
| 67991 | Li14Be5B(BO3)9 | 9.244e-1 | 5.546e-1 | 7.154e-10 | 1.144e+2 | 6.494e+5 | -0.591 |
| 69967 | NaLi2(PO4) | 9.218e-1 | 1.588e-2 | 2.441 | 3.572 | 1.516e-5 | 0.429 |
| 71035 | KLi6(BiO6) | 2.294e+1 | 2.622e+1 | 1.322e+1 | 1.336e+2 | 6.162e-2 | 0.272 |
| 72840 | Li6K(BiO6) | 1.329 | 8.498e-1 | 5.465e-1 | 1.205e+2 | 4.792e-7 | 0.611 |
| 74864 | CsKNa2Li8(Li(SiO4))4 | 2.780e-1 | 1.509e+1 | 3.397 | 1.002 | 1.885e-3 | 0.297 |
| 74865 | RbNa3Li8(Li(SiO4))4 | 5.855e-1 | 5.761e-1 | 3.648e-1 | 2.216e-1 | 7.972 | -0.061 |
| 78326 | Li10(Si2PbO10) | 5.724e+2 | 7.318e+2 | 1.398e+3 | 1.823e+3 | 1.453 | 0.283 |
| 78819 | Li10N3Br | 3.298e+2 | 1.192e+3 | 2.010e+3 | 2.815e+3 | 2.597e-2 | 0.435 |
| 86184 | LiZn(AsO4) | 1.117e-1 | 1.390e-1 | 8.598e-2 | 2.360e-10 | 5.009e+26 | -2.436 |
| 86458 | Li3Sc2(PO4)3 | 2.132e+2 | 6.799e+2 | 5.602e+2 | 7.723e+2 | 7.987e-1 | 0.279 |
| 87596 | Li2(TiO)(SiO4) | 4.022e-01 | 6.572e-10 | 5.476e-10 | 4.694e-10 | 1.072e+32 | -3.206 |
| 92708 | Li(AlSiO4) | 3.725e-3 | 3.332e-2 | 3.937e-2 | 3.443e-2 | 2.504e-7 | 0.455 |
| 95972 | Li2(MgSiO4) | 6.694e-2 | 5.208e-1 | 6.012e-1 | 2.268e-1 | 1.255e-4 | 0.323 |
| 202115 | NaLi3(SiO4) | 4.066e-1 | 9.919e-10 | 8.266e-10 | 7.085e-10 | 2.478e+31 | -3.142 |
| 202116 | NaLi3GeO4 | 1.426e-1 | 1.235e-1 | 3.641e-1 | 6.537e-10 | 6.402e+24 | -2.255 |
| 241234 | Li3Sc(BO3)2 | 9.860e-10 | 3.113e-1 | 6.573e-10 | 3.655e+1 | 1.586e-35 | 2.586 |
| 252215 | Li3AlSiO5 | 4.912e-1 | 1.963e-1 | 7.578e-10 | 6.495e-10 | 1.655e+40 | -3.703 |
| 253895 | Li10Si2P6 | 4.076 | 2.398 | 1.538e+1 | 7.410e+1 | 9.315e-06 | 0.549 |
| 257740 | LiGa0.5Al0.5GeO4 | 4.407e-10 | 3.525e-10 | 2.938e-10 | 2.518e-10 | 1.175e-09 | 0.0 |
| 262642 | In2Li2SiS6 | 7.233e-1 | 3.057 | 1.545e+2 | 5.927e+1 | 2.546e-10 | 0.934 |
| 262643 | In2Li2GeS6 | 2.952e-10 | 7.809 | 2.034e+2 | 2.910e+2 | 2.814e-56 | 4.589 |
| 402341 | LiBeN | 3.459e-1 | 2.325e-1 | 8.006e-2 | 9.694e-2 | 3.598e+1 | -0.15 |
| 413355 | (LiI)2(Li3(SbS3)) | 3.776e+2 | 1.049e+3 | 1.983e+3 | 2.650e+3 | 5.336e-2 | 0.408 |
| 424834 | Li3SbS3 | 8.335e-10 | 4.754e+2 | 1.546e+3 | 1.635e+3 | 4.350e-56 | 4.654 |
| 424835 | Li3AsS3 | 1.216e+3 | 1.468e+3 | 2.479e+3 | 3.150e+3 | 7.378 | 0.247 |
| 431367 | Li2SiP2 | 3.286e+2 | 6.504e+2 | 1.392e+3 | 2.373e+3 | 4.137e-2 | 0.408 |

Table S6. Oxide compounds that passed the threshold of activation barriers

| ICSD-IDs | Compositions | Structure Type | Activation barrier | ESW |
| --- | --- | --- | --- | --- |
| 9987 | Li6Ga2(BO3)4 | Li3AlB2O6 | 0.826 | 1.654 |
| 15631 | Li7(SbO6) |  | 0.228 | 1.137 |
| 23634 | Li10(Zn4O9) |  | 0.627 | 1.405 |
| 26817 | LiAl(Si2O6) | LiAlSi2O6 | 0.272 | 0 |
| 35250 | K2Li14(Pb3O14) | K2Li14Pb3O4 | 0.998 | 0.553 |
| 40245 | Li3BiO3 |  | 0.573 | 0.977 |
| 40457 | LiSbS2 | AgAsS2 | 0.349 | 0.160 |
| 59381 | Li3(AsS3) |  | 0.260 | 0.203 |
| 59640 | Li4Zn(PO4) 2 | Li4O8P2Zn | 0.387 | 1.772 |
| 69967 | NaLi2(PO4) | Li3PO4 | 0.429 | 3.190 |
| 71035 | KLi6(BiO6) | KLi6IrO6 | 0.272 | 1.064 |
| 72840 | Li6K(BiO6) |  | 0.611 | 1.063 |
| 74864 | CsKNa2Li8(Li(SiO4))4 | CsKNa2Li8(LiSiO4)4 | 0.297 | 2.382 |
| 78326 | Li10(Si2PbO10) |  | 0.283 | 0 |
| 78819 | Li10N3Br |  | 0.435 | 0.53 |
| 86458 | Li3Sc2(PO4)3 | Li3Fe2(PO4)3 | 0.279 | 0 |
| 92708 | Li(AlSiO4) | LiGaSiO4 | 0.455 | 2.667 |
| 95972 | Li2(MgSiO4) | Li2ZnSiO4 | 0.323 | 2.739 |
| 253895 | Li10Si2P6 |  | 0.549 | 0.373 |
| 262642 | In2Li2SiS6 | Cd4GeS6 | 0.934 | 0.755 |
| 413355 | (LiI)2(Li3(SbS3)) |  | 0.408 | 0.325 |
| 424835 | Li3AsS3 |  | 0.247 | 0.204 |
| 431367 | Li2SiP2 |  | 0.408 | 0.427 |


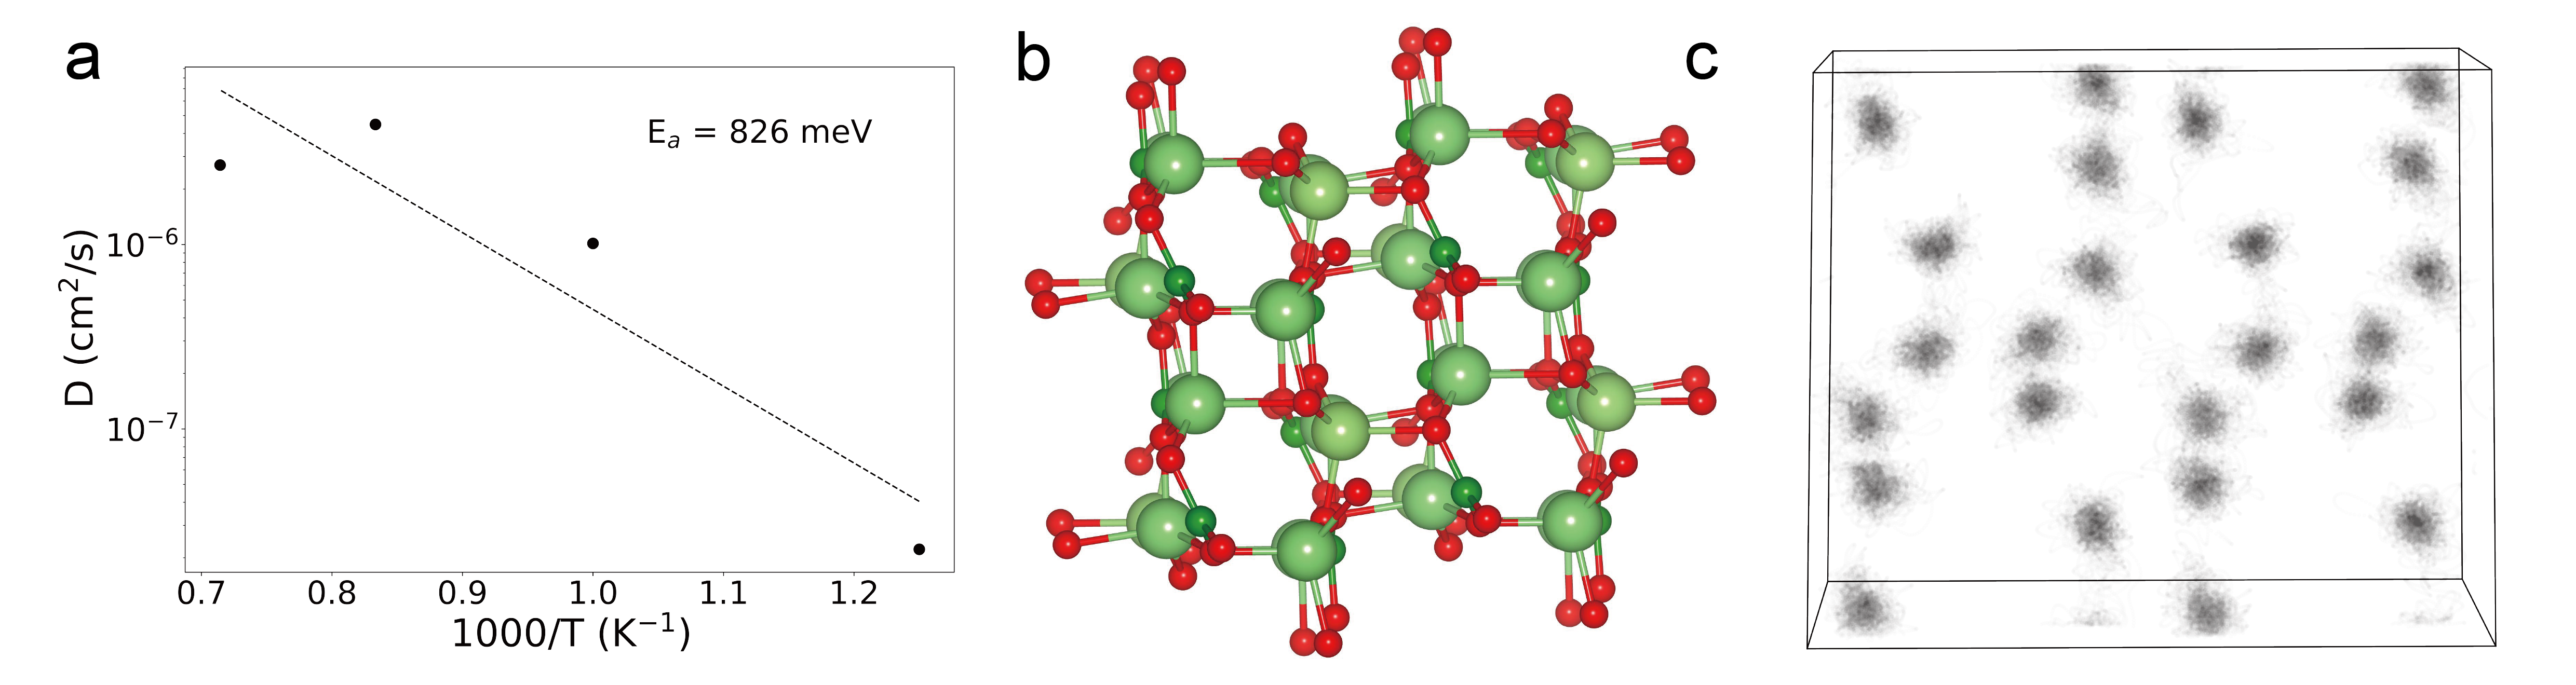


Figure S1. AIMD simulations of Li6Ga2(BO3)4. a) Arrhenius plot of lithium-ion diffusion coefficient. b) The structure schematic. c) Isosurface of lithium-ion probability density from the 800-1400K AIMD simulation.


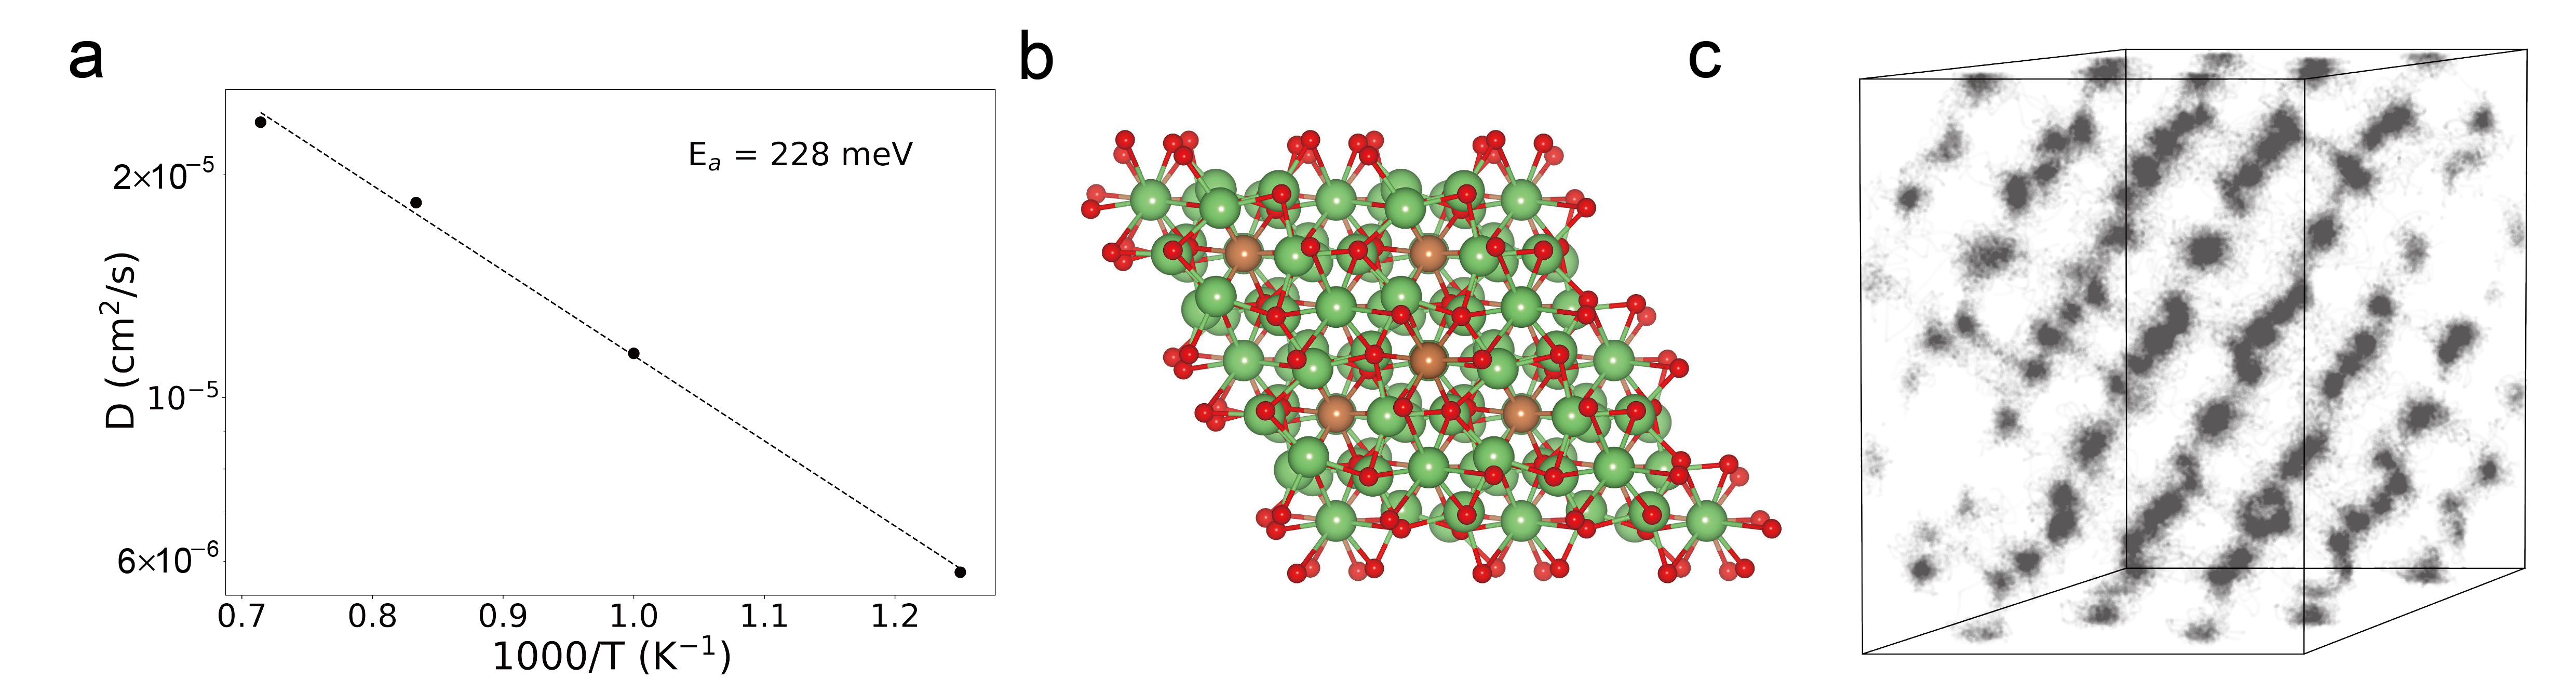


Figure S2. AIMD simulations of Li7SbO6. a) Arrhenius plot of lithium-ion diffusion coefficient. b) The structure schematic. c) Isosurface of lithium-ion probability density from the 800-1400K AIMD simulation.


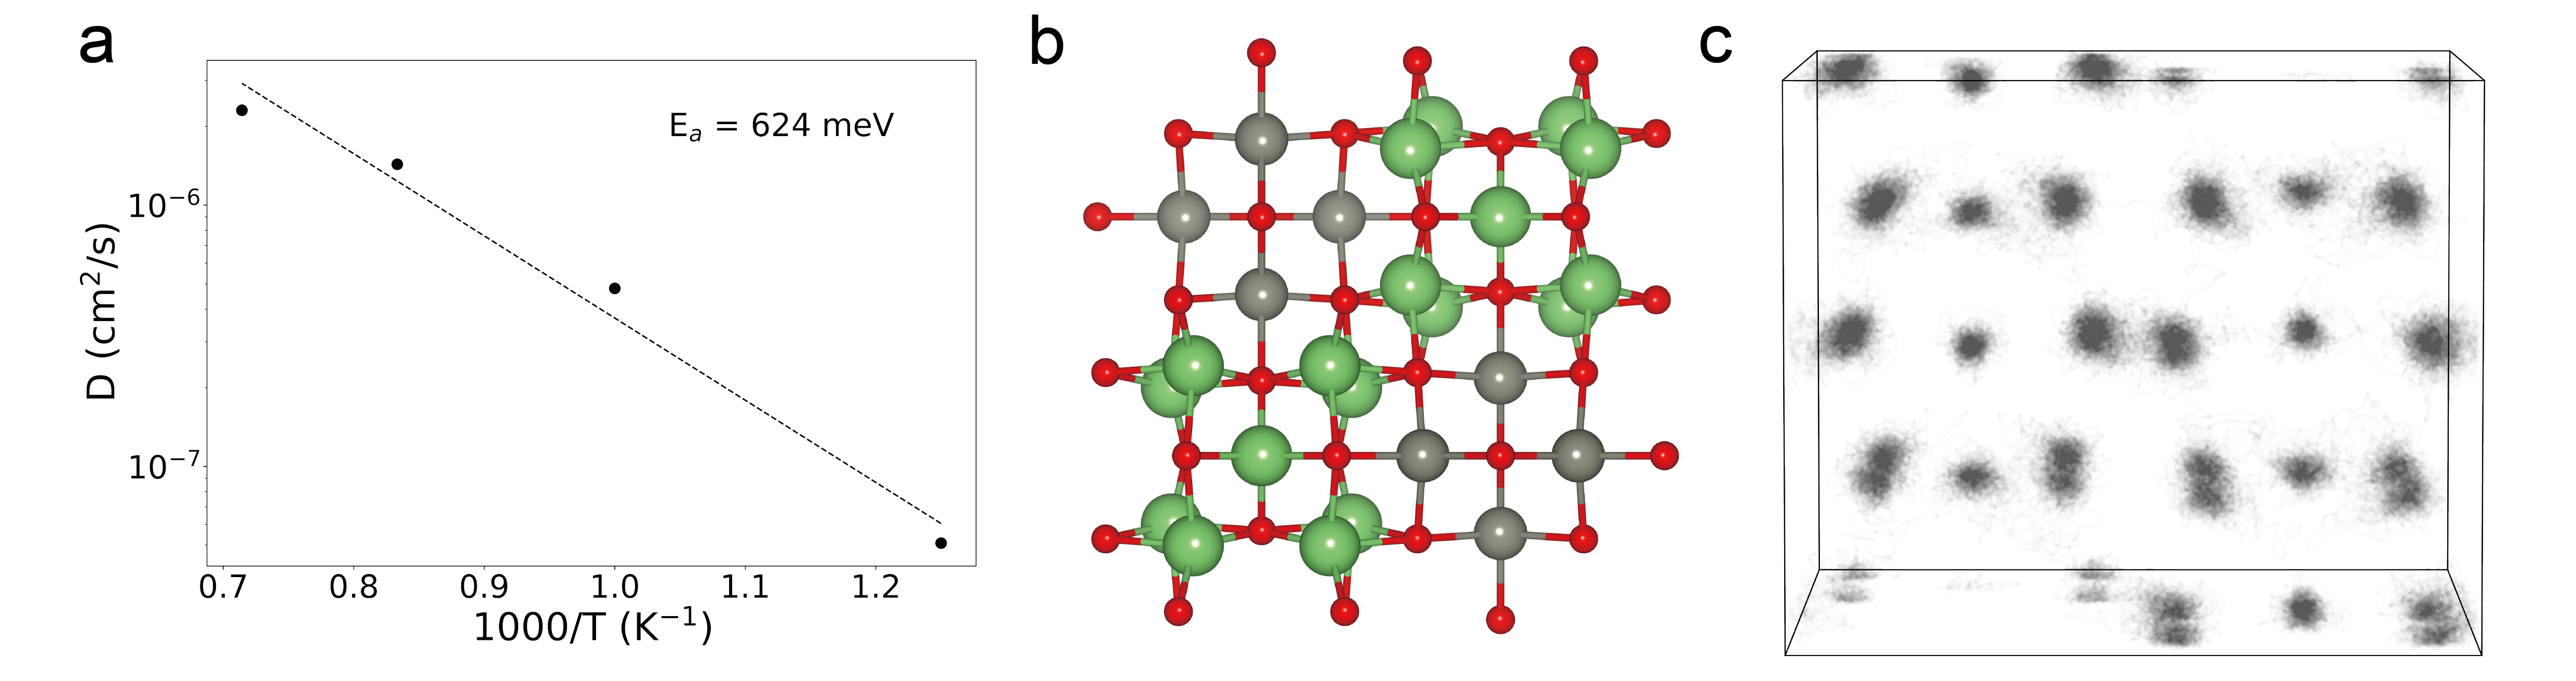


Figure S3. AIMD simulations of Li10Zn4O9. a) Arrhenius plot of lithium-ion diffusion coefficient. b) The structure schematic. c) Isosurface of lithium-ion probability density from the 800-1400K AIMD simulation.


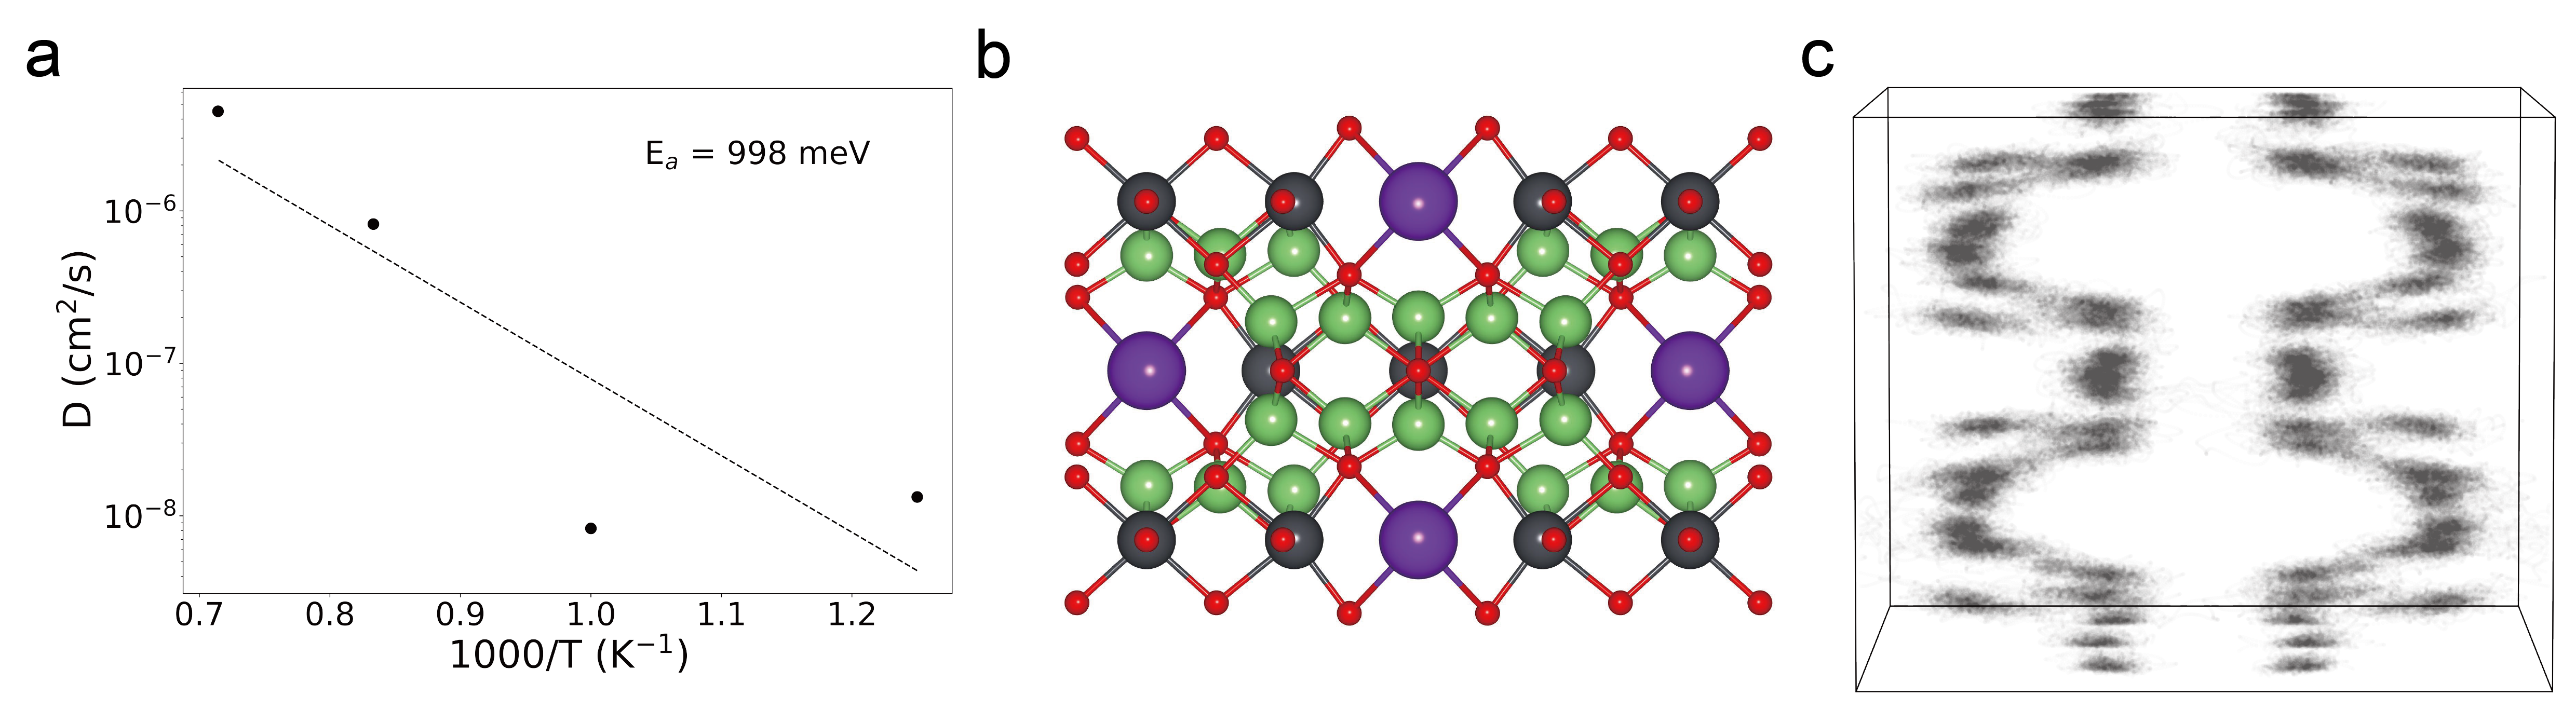


Figure S4. AIMD simulations of K2Li14Pb3O14. a) Arrhenius plot of lithium-ion diffusion coefficient. b) The structure schematic. c) Isosurface of lithium-ion probability density from the 800-1400K AIMD simulation.


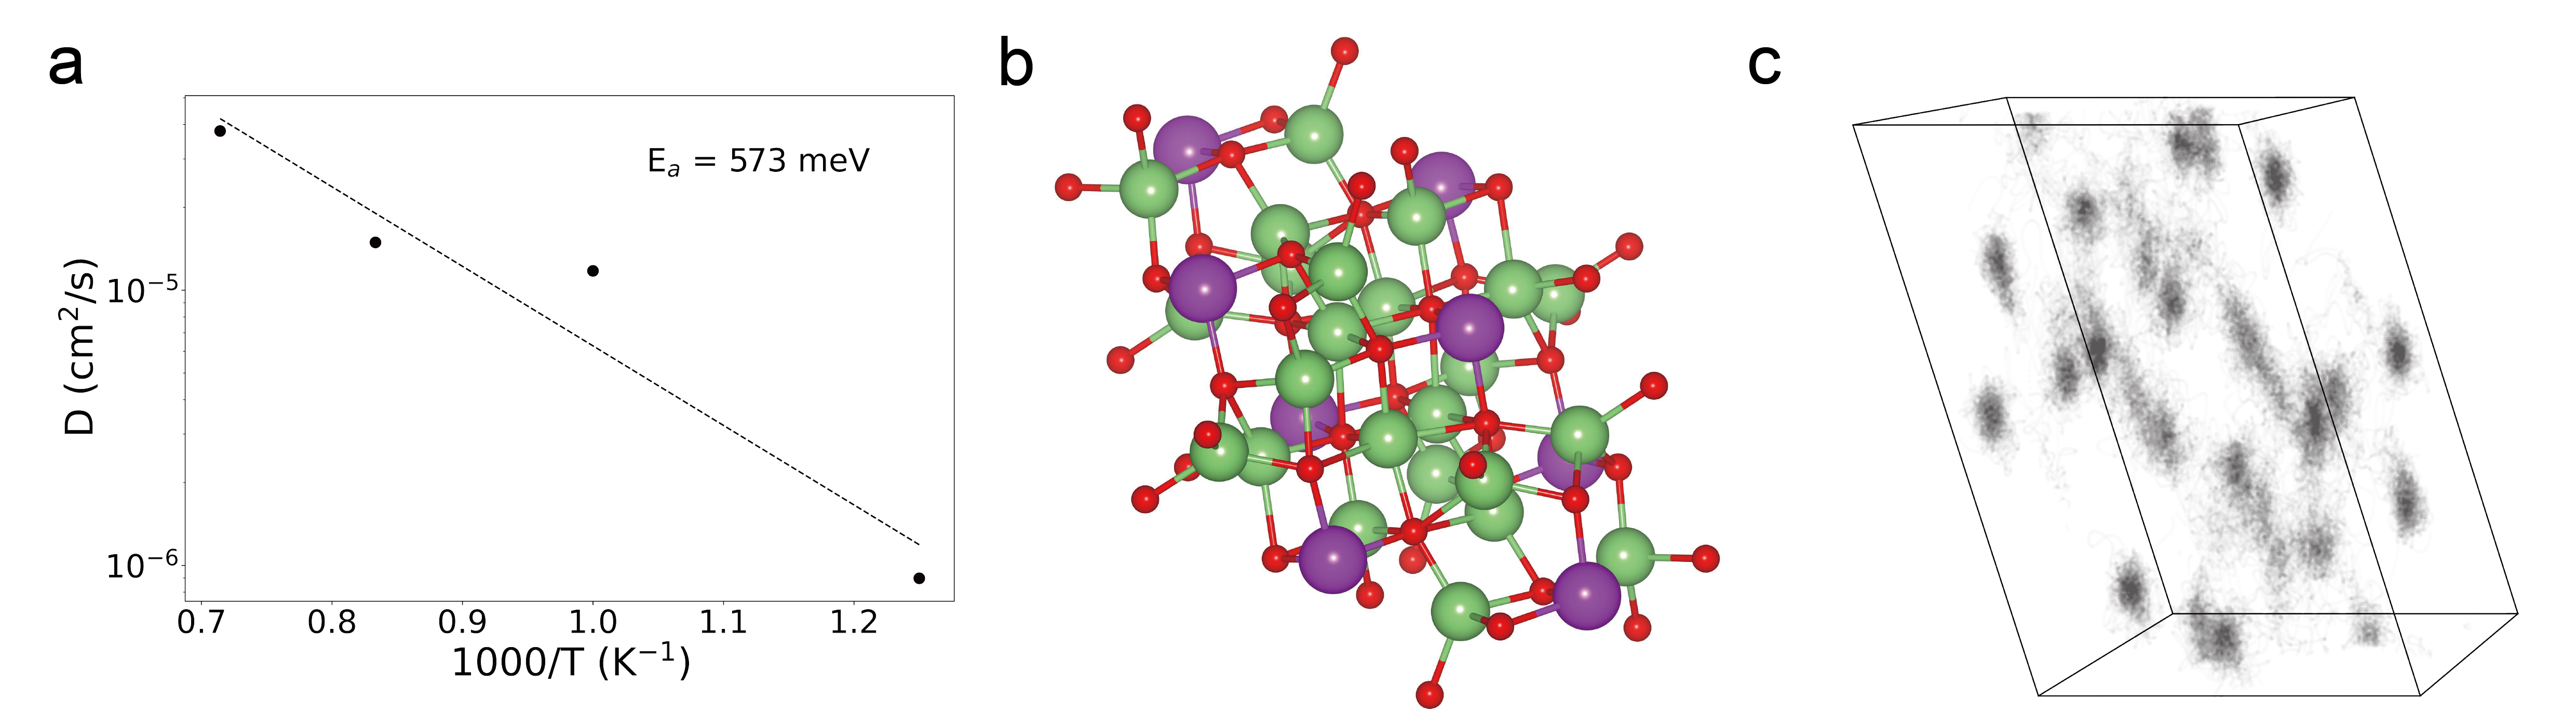


Figure S5. AIMD simulations of Li3BiO3. a) Arrhenius plot of lithium-ion diffusion coefficient. b) The structure schematic. c) Isosurface of lithium-ion probability density from the 800-1400K AIMD simulation.


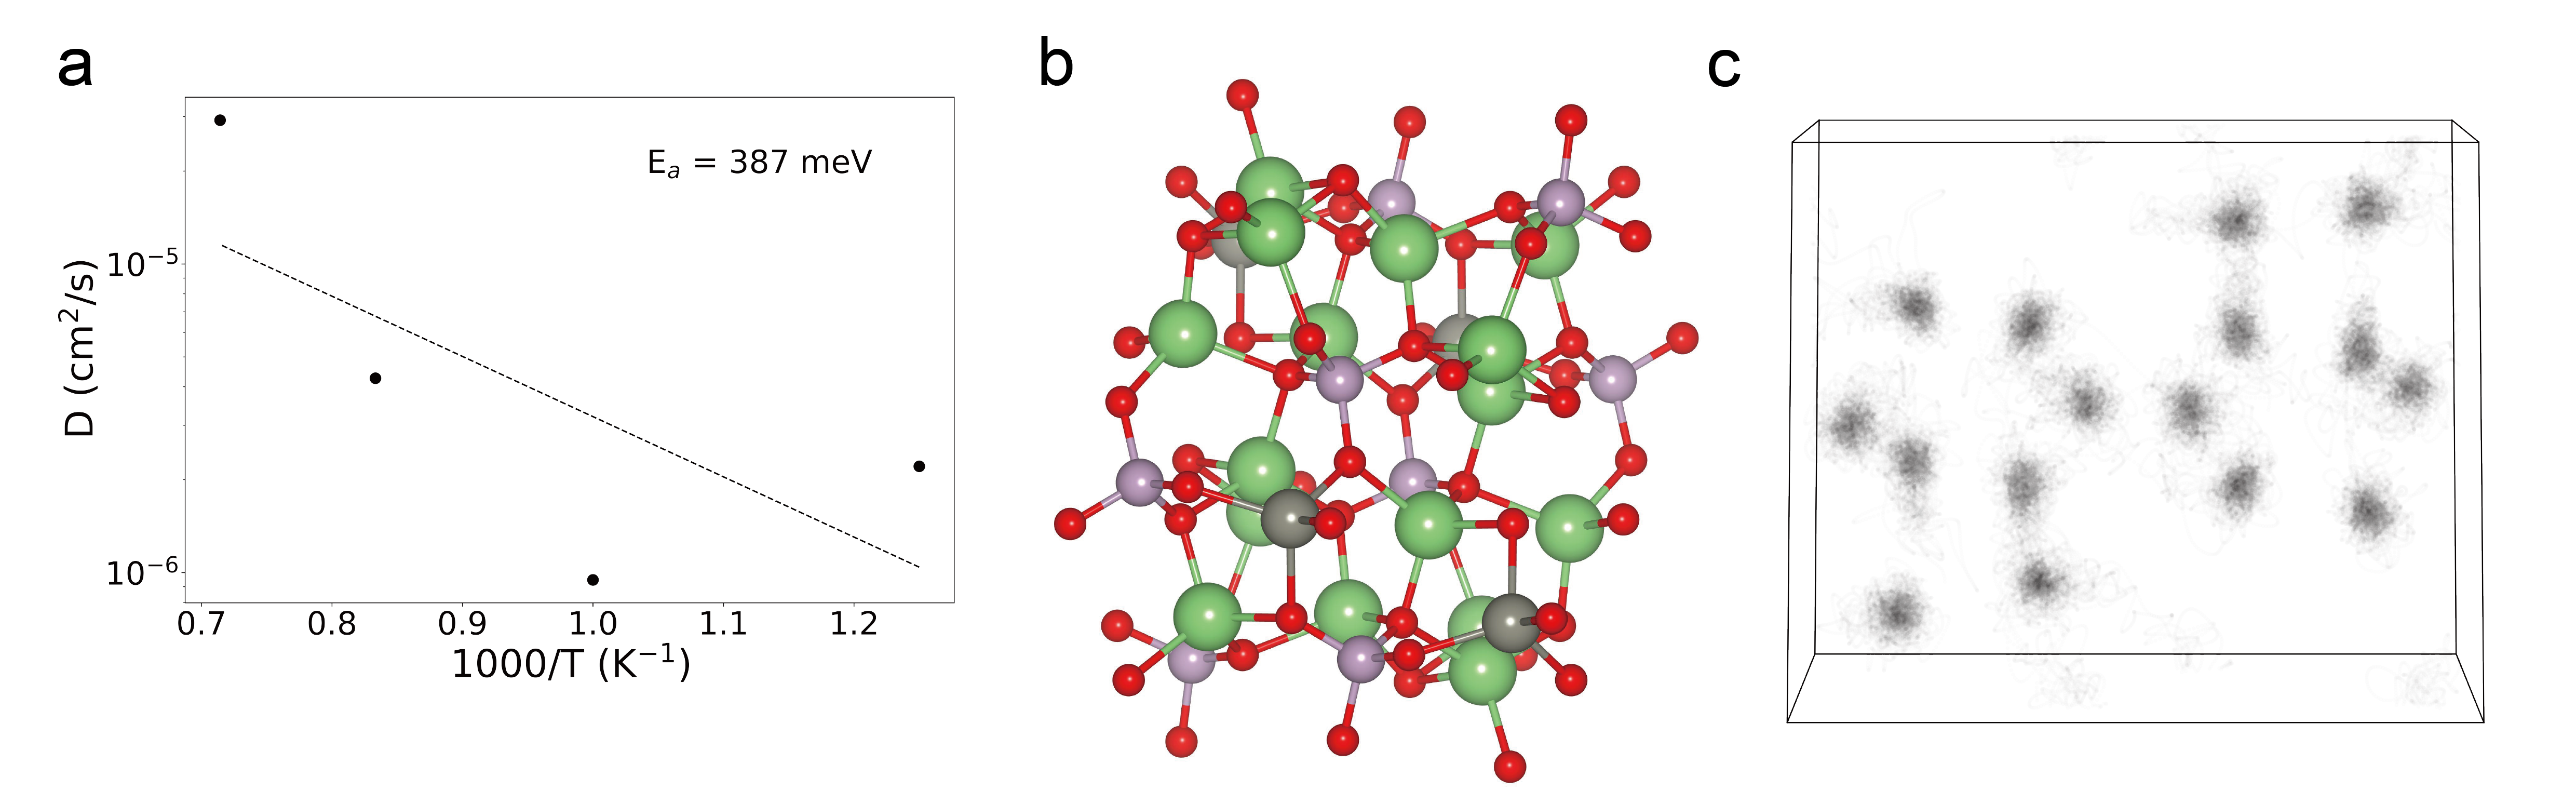


Figure S6. AIMD simulations of Li4Zn(PO4) 2. a) Arrhenius plot of lithium-ion diffusion coefficient. b) The structure schematic. c) Isosurface of lithium-ion probability density from the 800-1400K AIMD simulation.


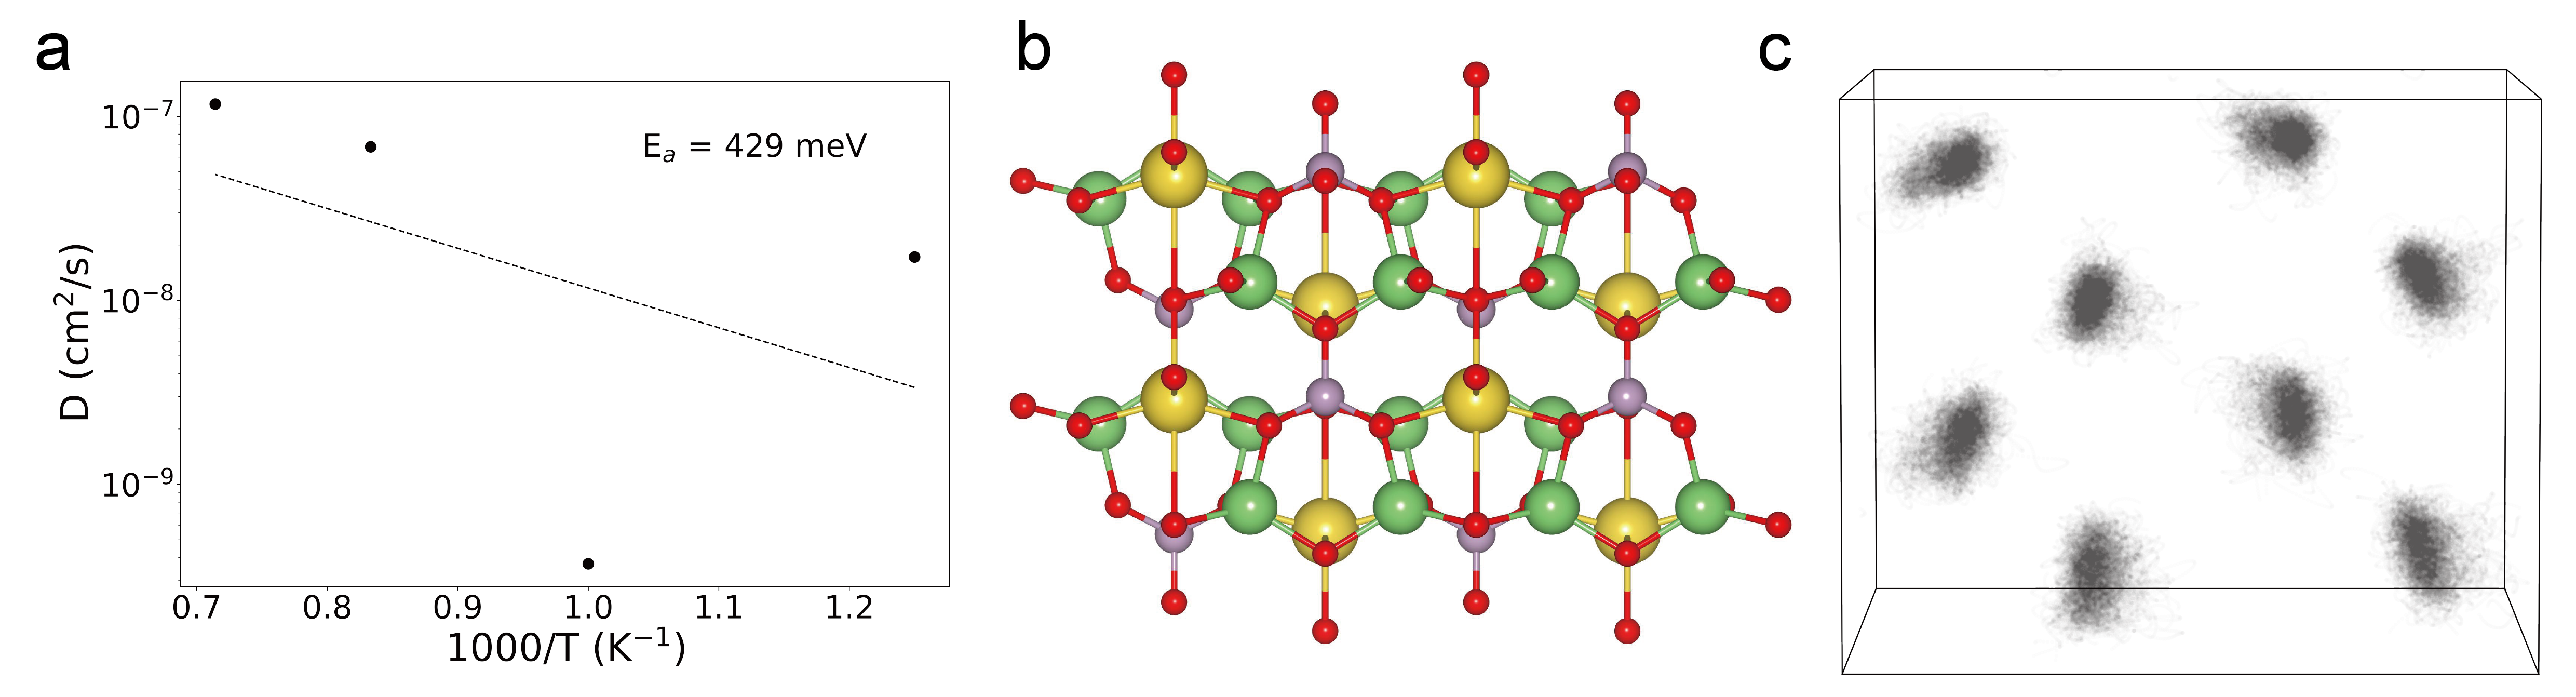


Figure S7. AIMD simulations of NaLi2PO4. a) Arrhenius plot of lithium-ion diffusion coefficient. b) The structure schematic. c) Isosurface of lithium-ion probability density from the 800-1400K AIMD simulation.


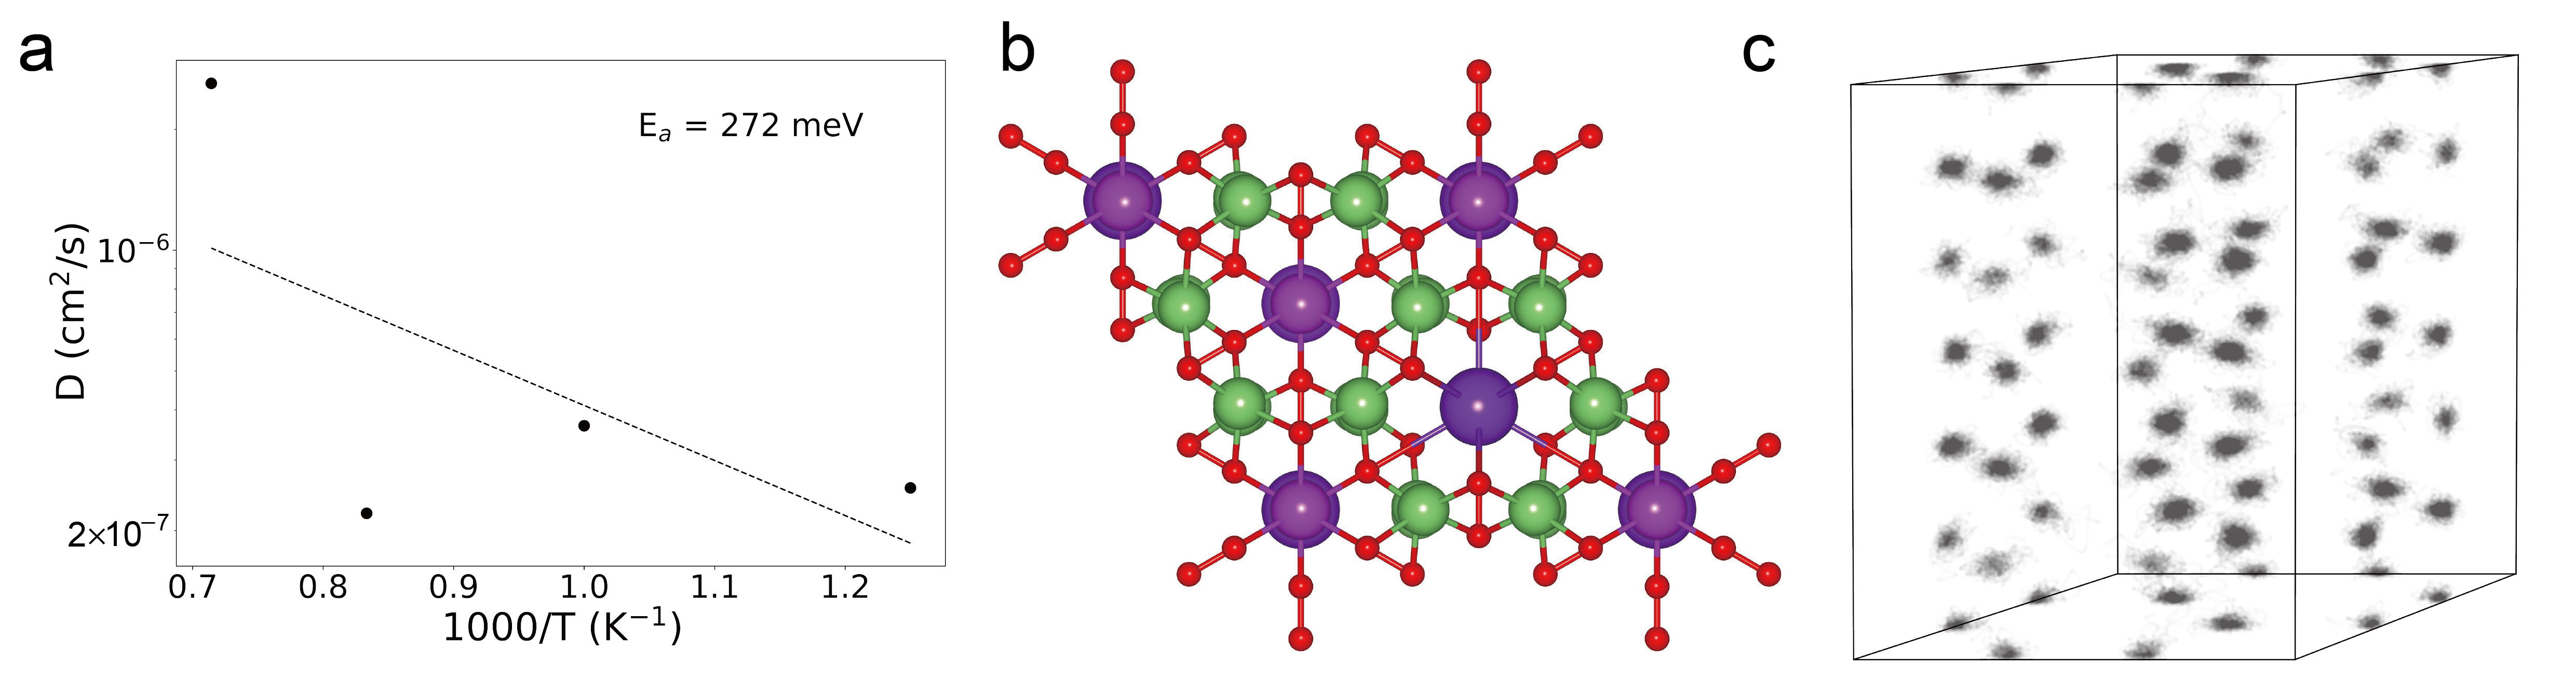


Figure S8. AIMD simulations of KLi6BiO6. a) Arrhenius plot of lithium-ion diffusion coefficient. b) The structure schematic. c) Isosurface of lithium-ion probability density from the 800-1400K AIMD simulation.


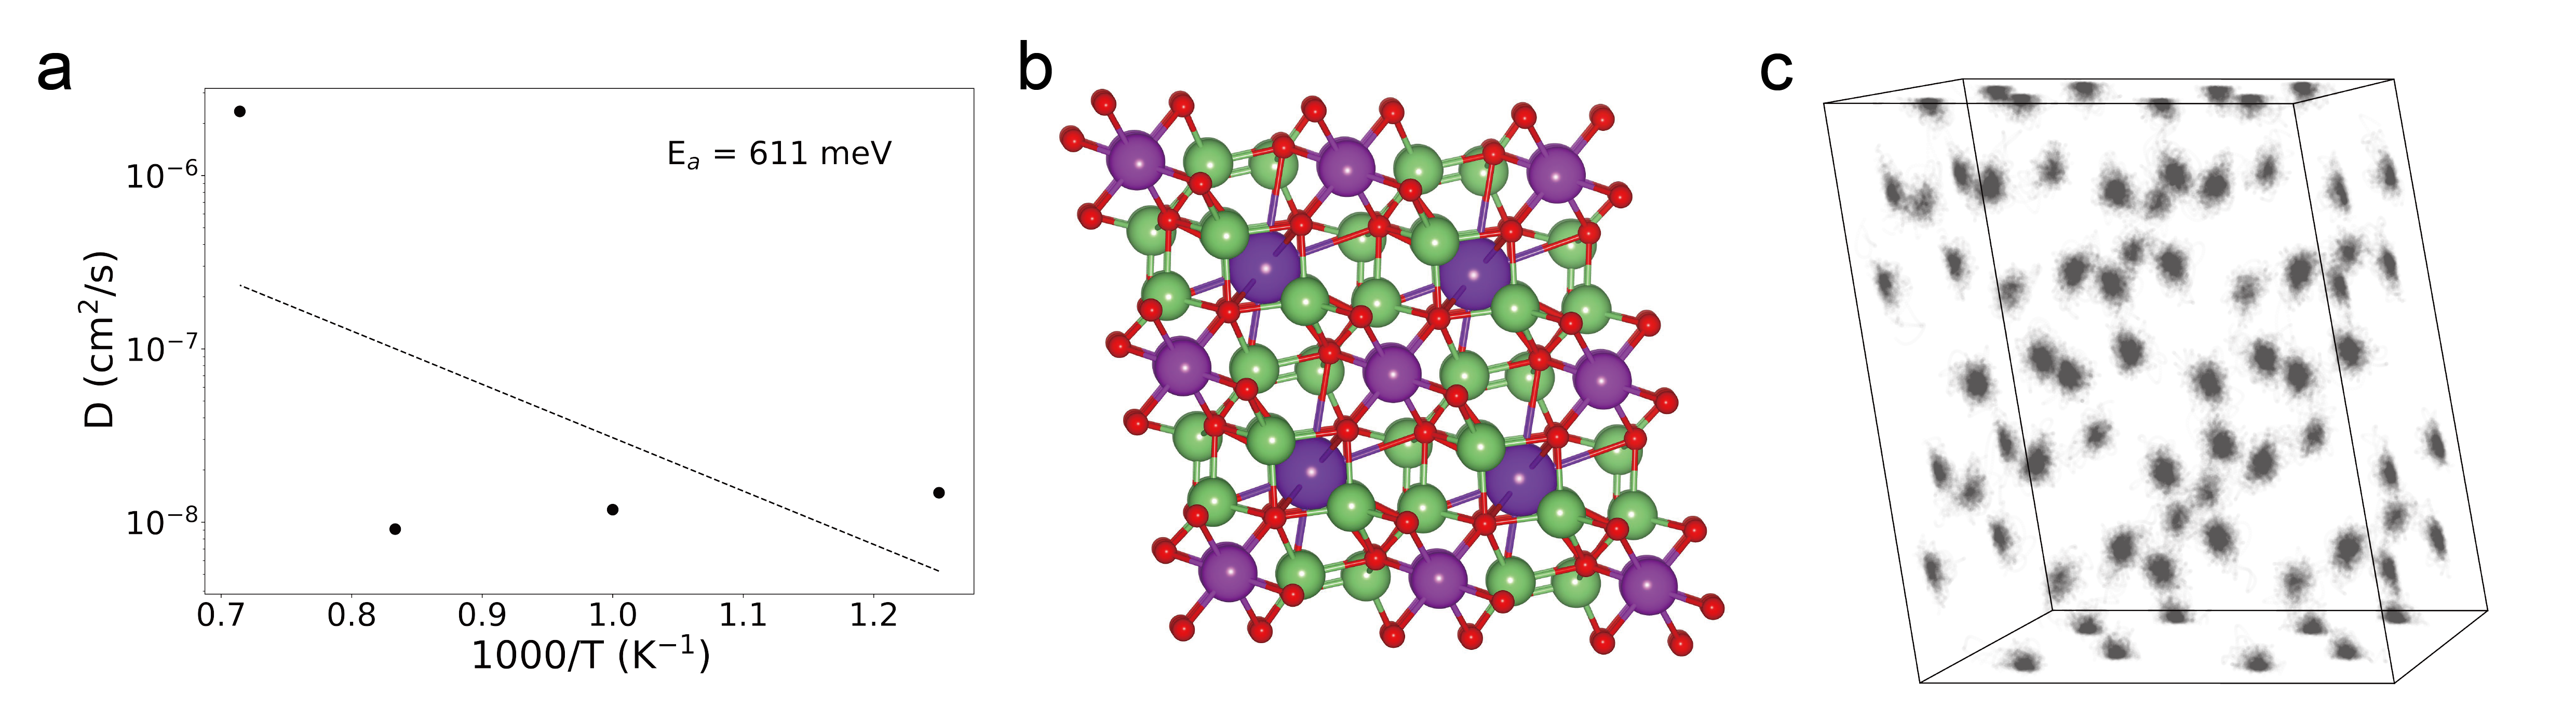
Figure S9. AIMD simulations of Li6KBiO6. a) Arrhenius plot of lithium-ion diffusion coefficient. b) The structure schematic. c) Isosurface of lithium-ion probability density from the 800-1400K AIMD simulation.


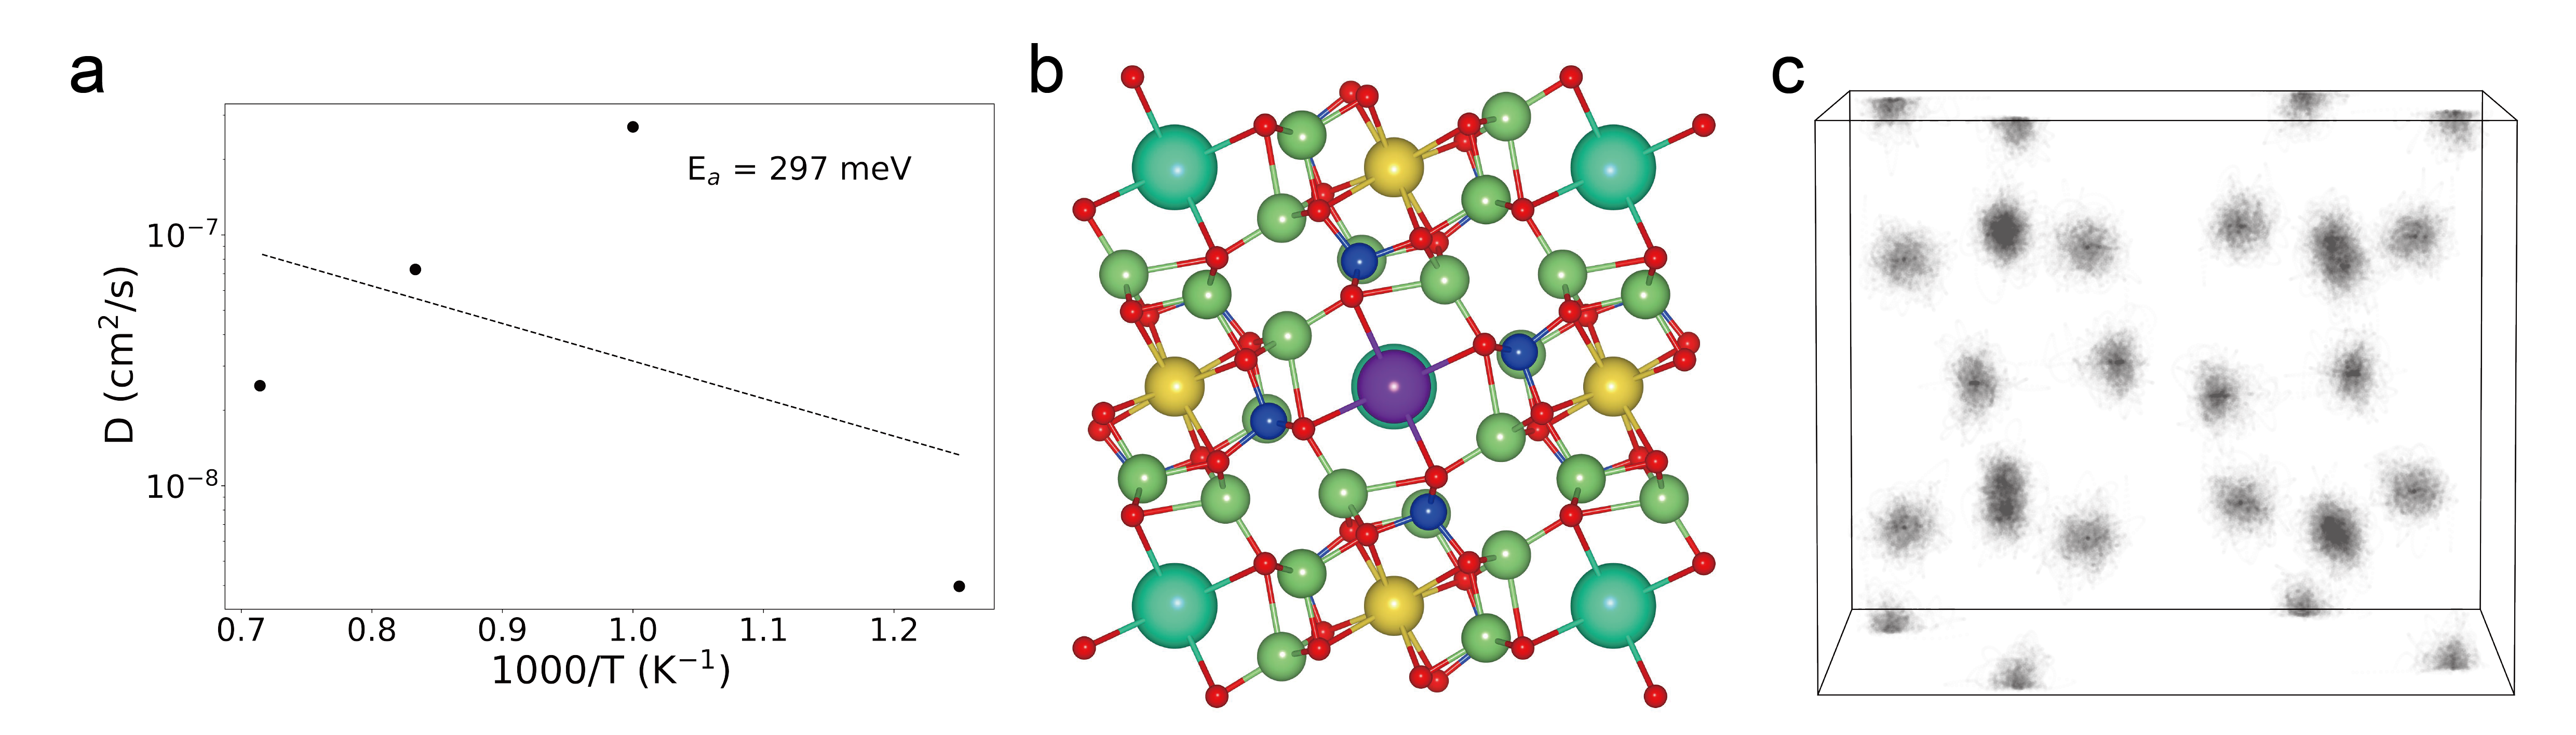


Figure S10. AIMD simulations of CsKNa2Li8(Li(SiO4))4. a) Arrhenius plot of lithium-ion diffusion coefficient. b) The structure schematic. c) Isosurface of lithium-ion probability density from the 800-1400K AIMD simulation.


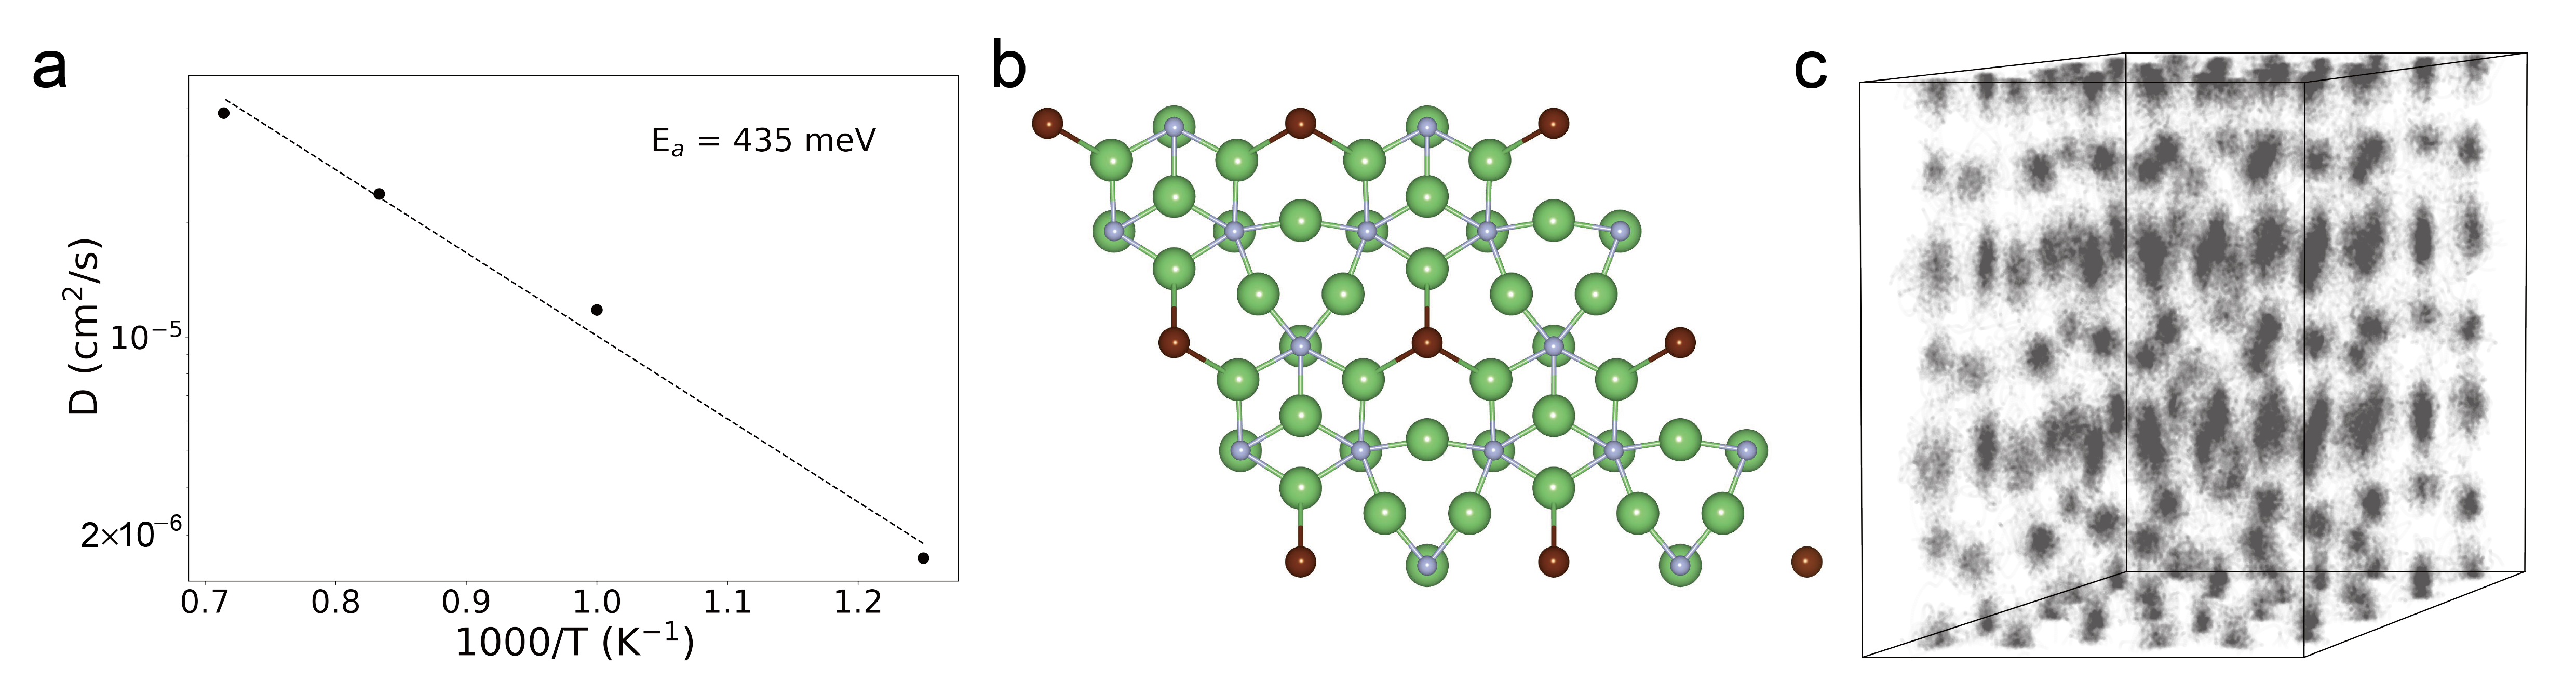


Figure S11. AIMD simulations of Li10N3Br. a) Arrhenius plot of lithium-ion diffusion coefficient. b) The structure schematic. c) Isosurface of lithium-ion probability density from the 800-1400K AIMD simulation.


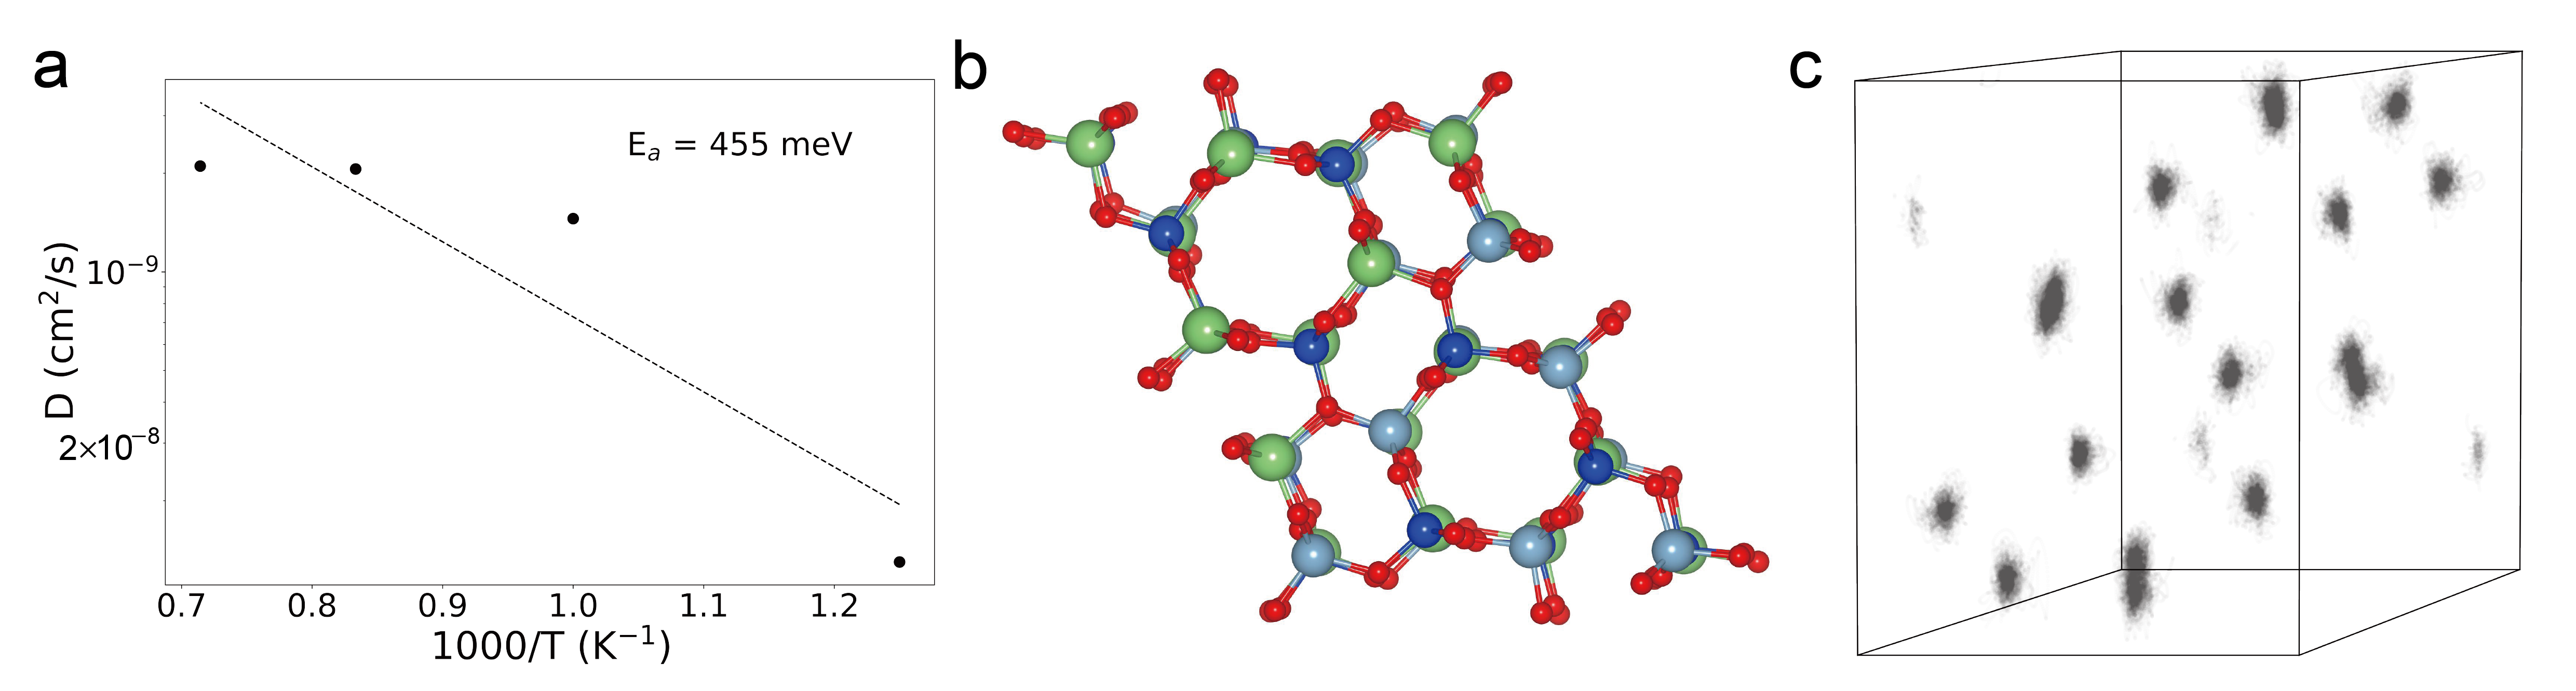


Figure S12. AIMD simulations of LiAlSiO4. a) Arrhenius plot of lithium-ion diffusion coefficient. b) The structure schematic. c) Isosurface of lithium-ion probability density from the 800-1400K AIMD simulation.


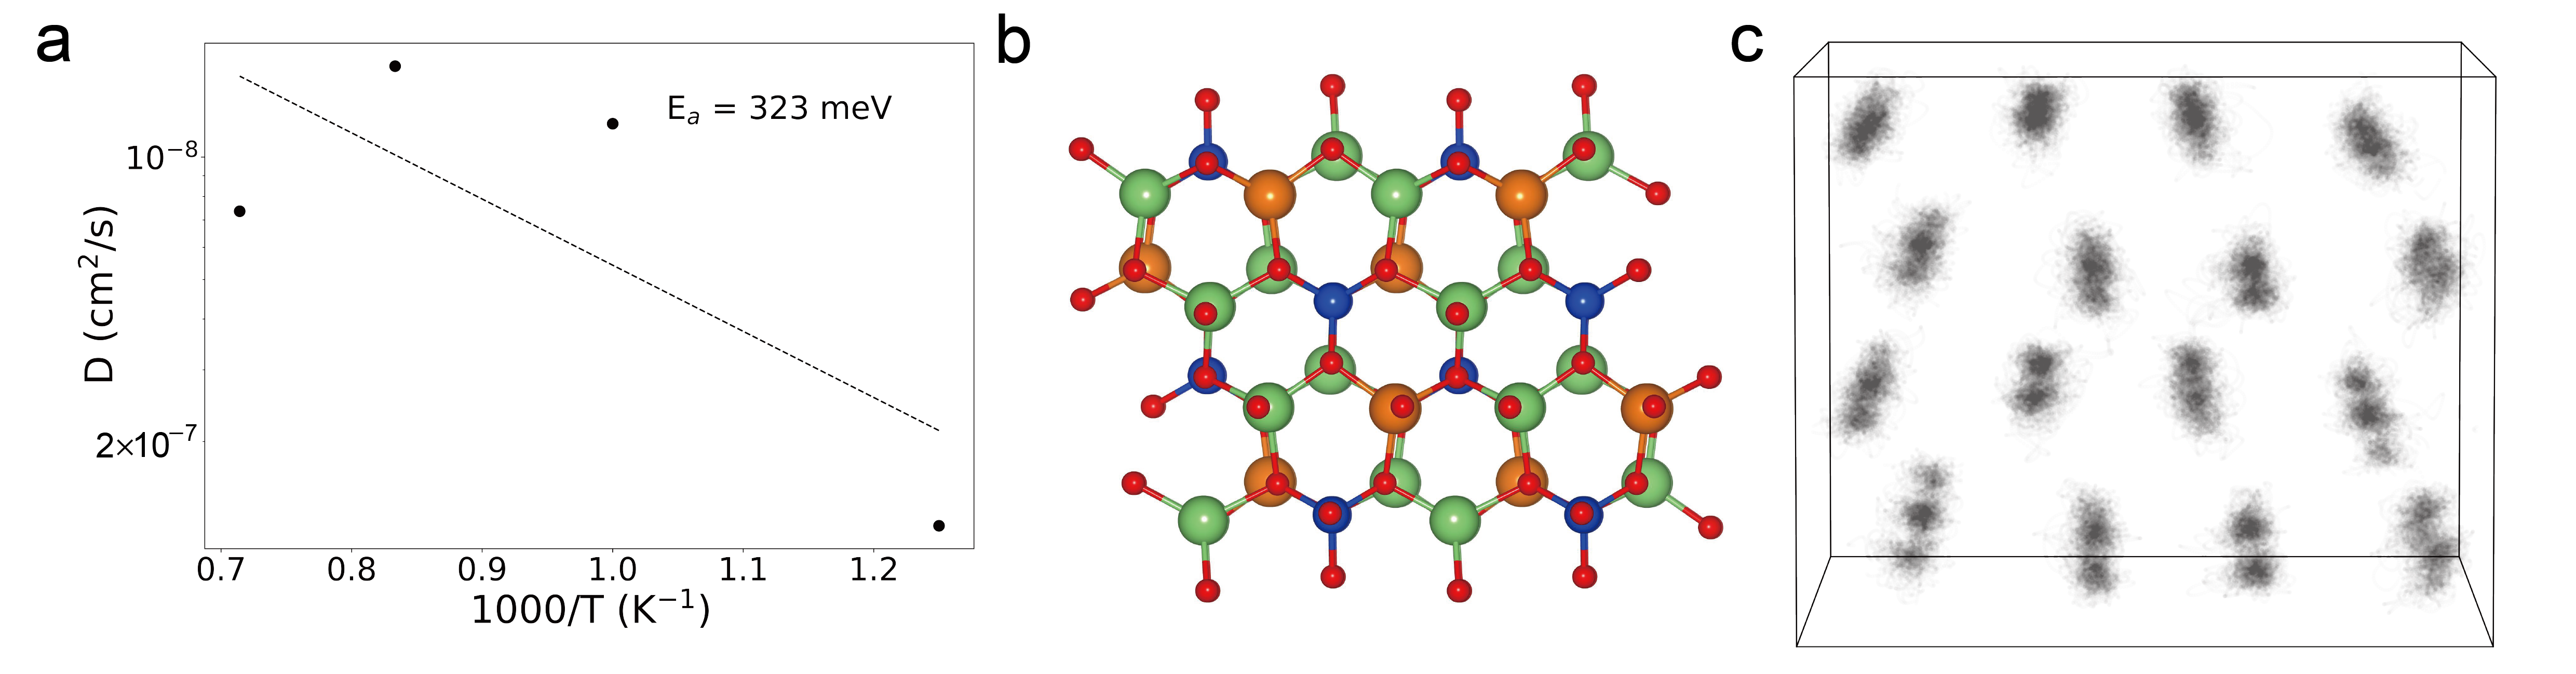


Figure S13. AIMD simulations of Li2MgSiO4. a) Arrhenius plot of lithium-ion diffusion coefficient. b) The structure schematic. c) Isosurface of lithium-ion probability density from the 800-1400K AIMD simulation.


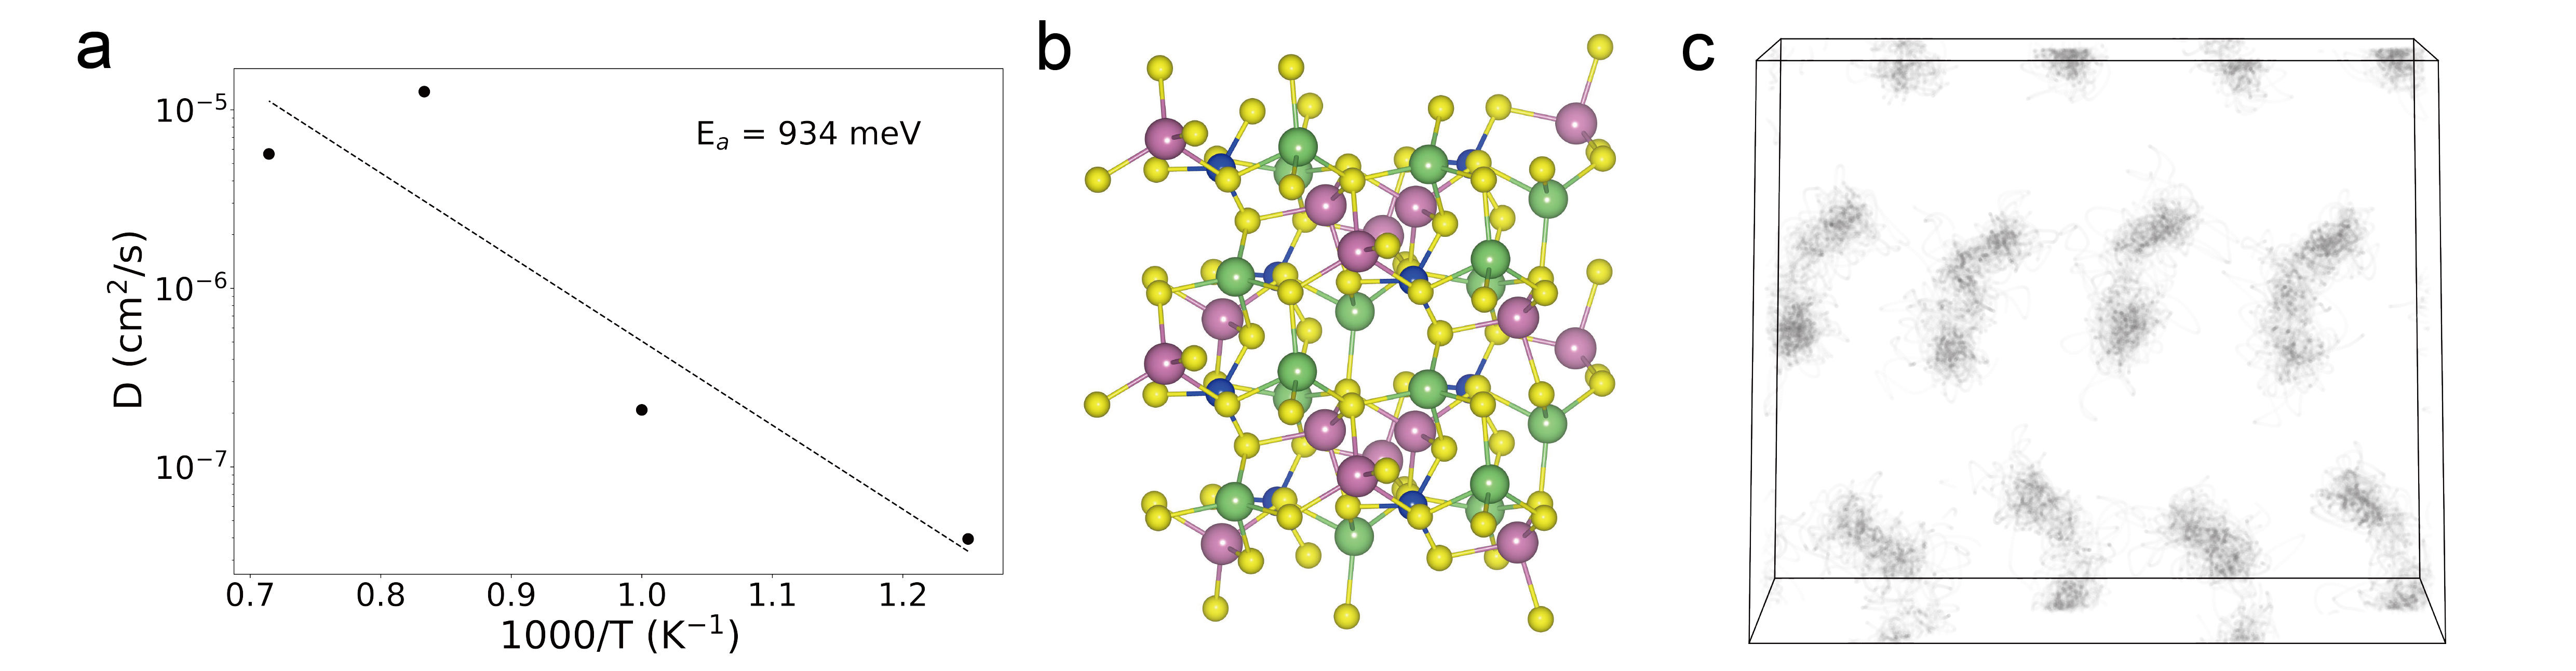


Figure S14. AIMD simulations of In2Li2SiS6. a) Arrhenius plot of lithium-ion diffusion coefficient. b) The structure schematic. c) Isosurface of lithium-ion probability density from the 800-1400K AIMD simulation.
